# Supplementary material for: Copper-catalyzed oxidative direct C3-cyanoarylation of quinoxalin-2(1H)-onesviadenitrogenative ring-opening of 3-aminoindazoles
Source: Royal Society of Chemistry journal article supplement (doi:10.1039/d2nj04309b), 2023-01-01
Supplement: d2nj04309b1.pdf [file d2nj04309b1.pdf]

# Supporting Information

## Copper-Catalyzed Oxidative Direct C3-cyanoarylation of Quinoxalin-2(1*H*)-ones *via* Denitrogenative Ring-Opening of 3- Aminoindazoles

ChenxuMou,<sup>a</sup> JinweiYuan,<sup>a,\*</sup> Qian Hu,<sup>a</sup> BingjieHan,<sup>a</sup> LiangruYang,<sup>a,\*</sup> YongmeiXiao,<sup>a</sup> Lulu Fan,<sup>a</sup>  
ShourenZhang,<sup>b,\*</sup> LingboQu<sup>c</sup>

<sup>a</sup> School of Chemistry & Chemical Engineering, Henan University of Technology, Zhengzhou  
450001, P. R. China

<sup>b</sup> Henan Key Laboratory of Nanocomposites and Applications; Institute of Nanostructured  
Functional Materials, Huanghe Science and Technology College, Zhengzhou 450006, P. R. China

<sup>c</sup> College of Chemistry, Zhengzhou University, Zhengzhou 450001, P. R. China

**\*Corresponding authors:**

**E-mail:** [yuanjinweigs@126.com](mailto:yuanjinweigs@126.com) (Jinwei Yuan)

---

### Contents

|                                                                                |     |
|--------------------------------------------------------------------------------|-----|
| 1 General information.....                                                     | S1  |
| 2 Screening the reaction conditions .....                                      | S1  |
| 3 Copies of spectra of products .....                                          | S3  |
| 4 D <sub>2</sub> O deuterium substitution experiment of product <b>5</b> ..... | S37 |
| 5 HR MS spectrum of the adduct <b>6</b> .....                                  | S37 |
| 6 HR MS spectrum of the adduct <b>7</b> .....                                  | S38 |

## 1 General information

All chemicals were commercially available and used as received without further. Column chromatography was performed using 300-400 mesh silica. Nuclear magnetic resonance spectra were recorded on Bruker Avance 400 MHz spectrometer.  $^1\text{H}$  NMR spectra are recorded in parts per million from tetramethylsilane. Data were reported as follows: chemical shift, multiplicity (s = singlet, d = doublet, t = triplet, m = multiplet and br = broad), coupling constant in Hz and integration.  $^{13}\text{C}$  NMR spectra were recorded in parts per million from tetramethylsilane.  $^{19}\text{F}$  NMR spectra were recorded in parts per million with fluorobenzene as external standard. High resolution mass spectra (HR MS) was performed using a Thermo Scientific Q Exactive Hybrid Quadrupole-Orbitrap mass spectrometer equipped with an EASY Spray nanospray source operated in positive ion mode. IR spectra were recorded on WQF-510 Fourier transform infrared spectrophotometer. Melting points were measured on an XT4A microscopic apparatus uncorrected.

## 2 Screening the reaction conditions

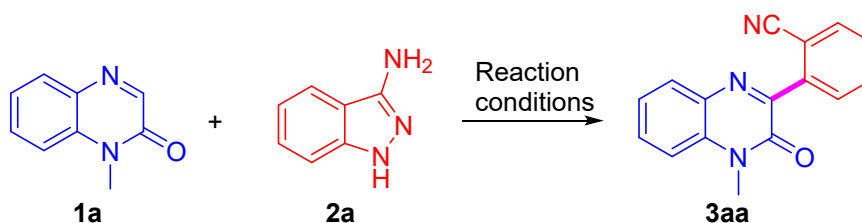

**Table S1** Screening the molar ratio of **1a** and **2a**<sup>a</sup>

| Entry | the molar ratio of <b>1a</b> and <b>2a</b> | Yields (%) <sup>b</sup> |
|-------|--------------------------------------------|-------------------------|
| 1     | 1 : 1.0                                    | 45                      |
| 2     | 1 : 1.2                                    | 50                      |
| 3     | 1 : 1.5                                    | 56                      |
| 4     | 1 : 2.0                                    | 56                      |

<sup>a</sup> Reaction conditions: 1-methyl quinoxalin-2(1H)-ones **1a** (0.2 mmol), 3-aminoindazole **2a**,  $\text{Cu}(\text{OAc})_2$  (0.03 mmol, 5.43 mg), TBPB (0.5 mmol, 97.0 mg), and MeCN (2 mL), heated in oil bath at 120 °C for 2.0 h under air.

<sup>b</sup> Isolated yield.

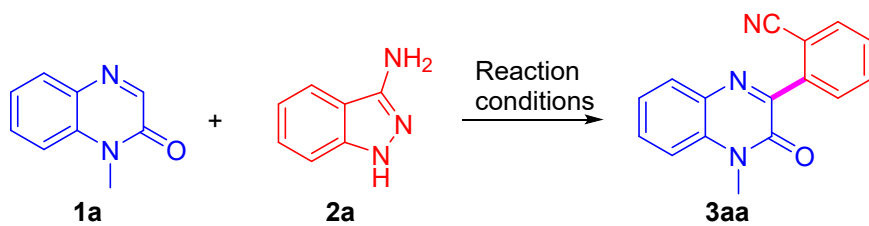

**Table S2** Screening the reaction temperature <sup>a</sup>

| Entry | the reaction temperature (°C) | Yields (%) <sup>b</sup> |
|-------|-------------------------------|-------------------------|
| 1     | 60                            | 40                      |
| 2     | 80                            | 51                      |
| 3     | 100                           | 63                      |
| 4     | 120                           | 57                      |

<sup>a</sup> Reaction conditions: 1-methyl quinoxalin-2(1H)-ones **1a** (0.2 mmol, 32.0 mg), 3-aminoindazole **2a** (0.3 mmol, 39.9 mg), Cu(OAc)<sub>2</sub> (0.03 mmol, 5.43 mg), TBPB (0.5 mmol, 97.0 mg), and MeCN (2 mL), heated at 120 °C for 2.0 h under air.

<sup>b</sup> Isolated yield.

### 3 Copies of spectra of products

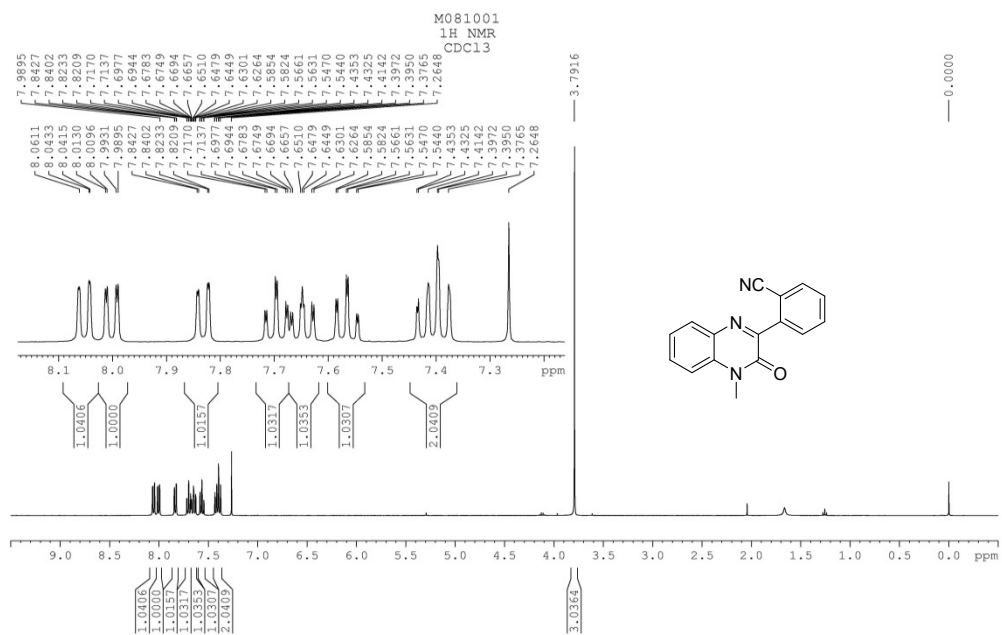

Fig. 1 <sup>1</sup>H NMR spectrum of compound 3aa

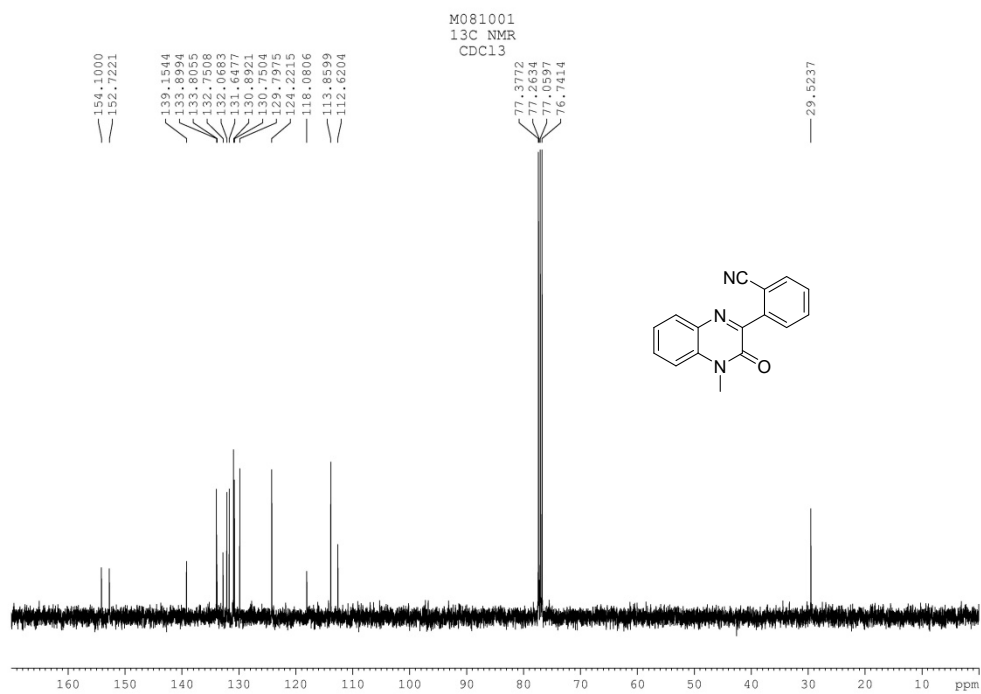

Fig. 2 <sup>13</sup>C NMR spectrum of compound 3aa

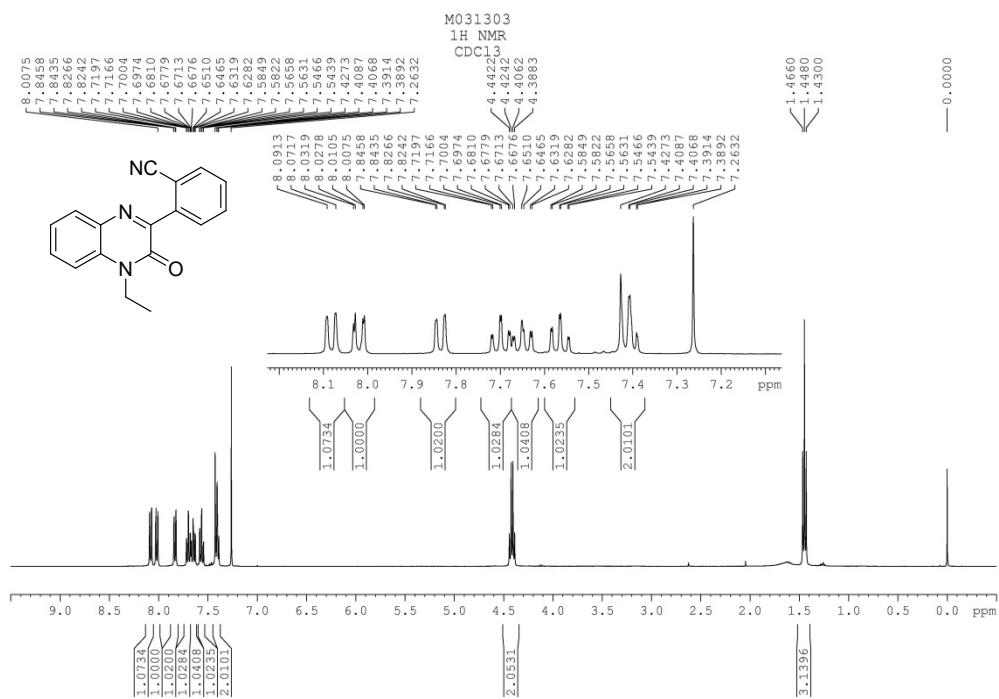

Fig. 3 <sup>1</sup>H NMR spectrum of compound 3ba

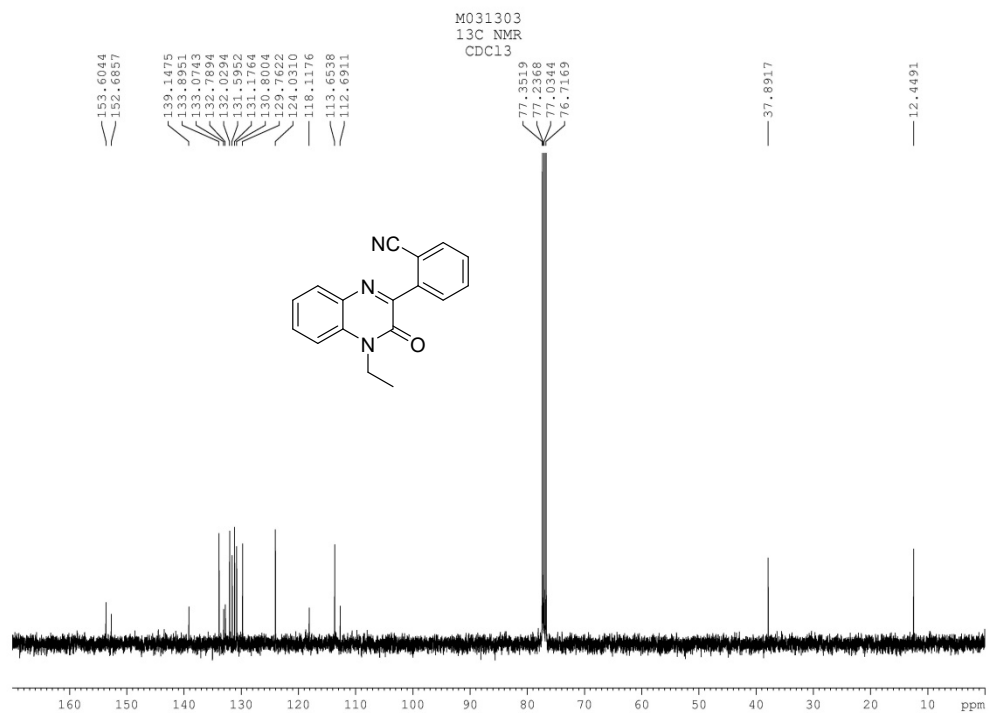

Fig. 4 <sup>13</sup>C NMR spectrum of compound 3ba

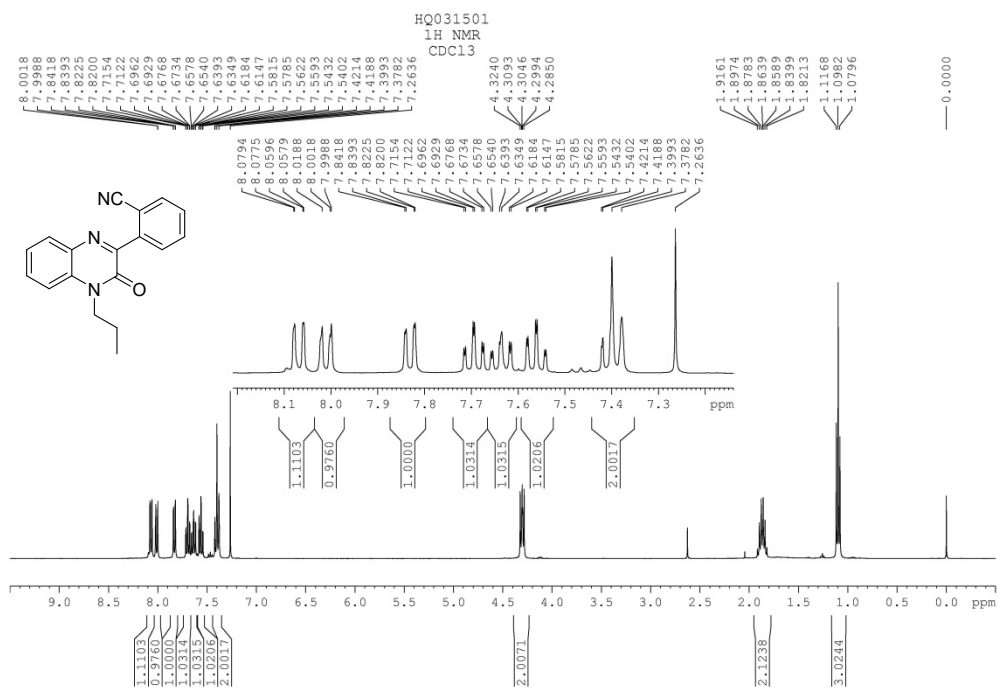

Fig. 5 <sup>1</sup>H NMR spectrum of compound 3ca

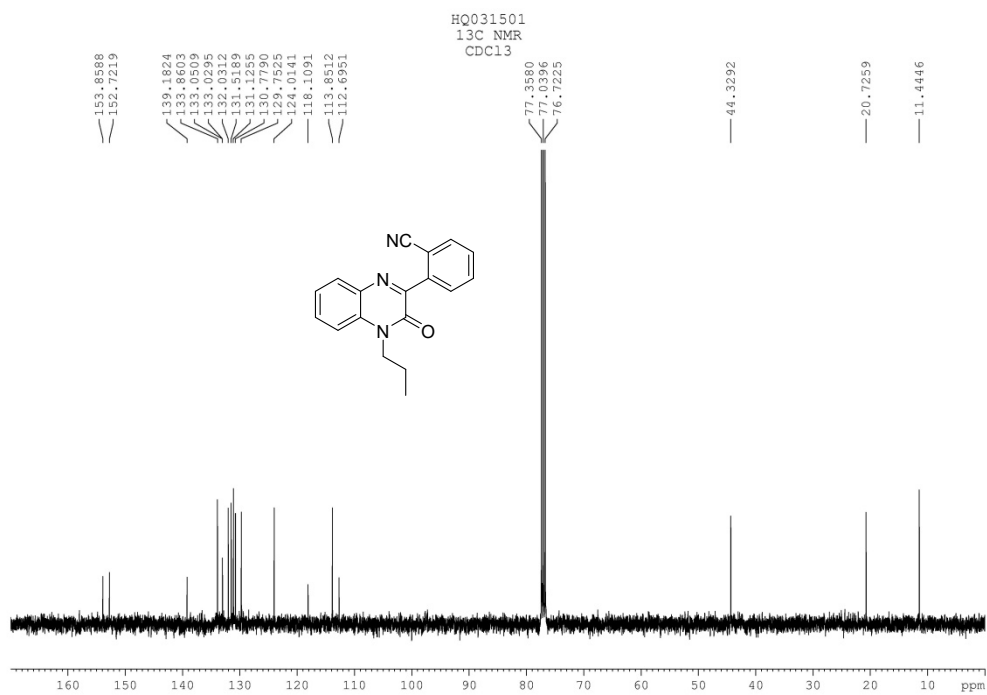

Fig. 6 <sup>13</sup>C NMR spectrum of compound 3ca

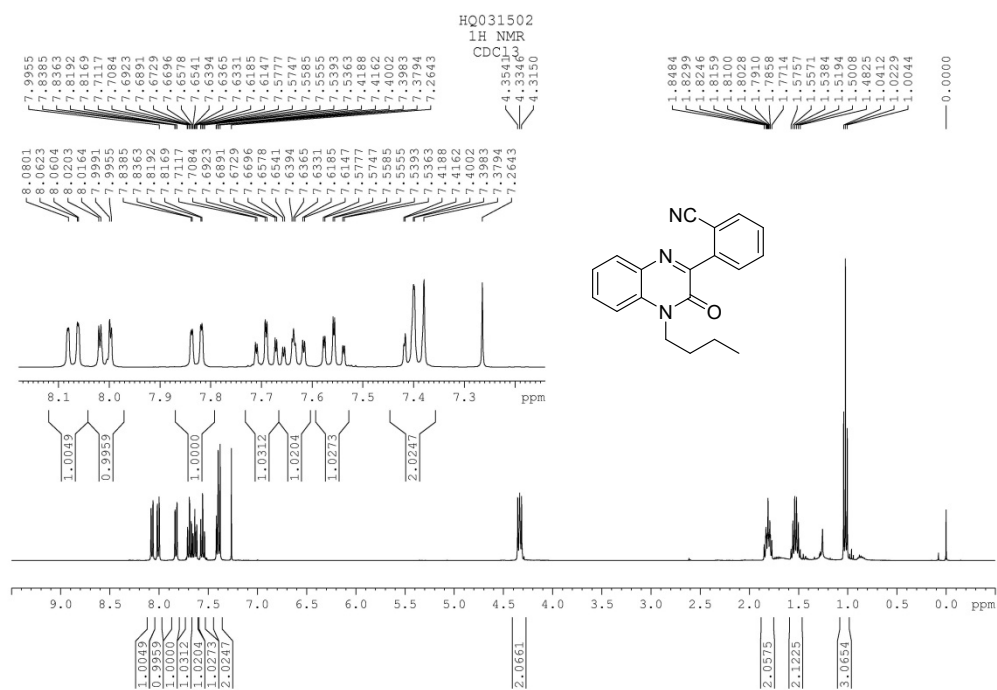

Fig. 7 <sup>1</sup>H NMR spectrum of compound 3da

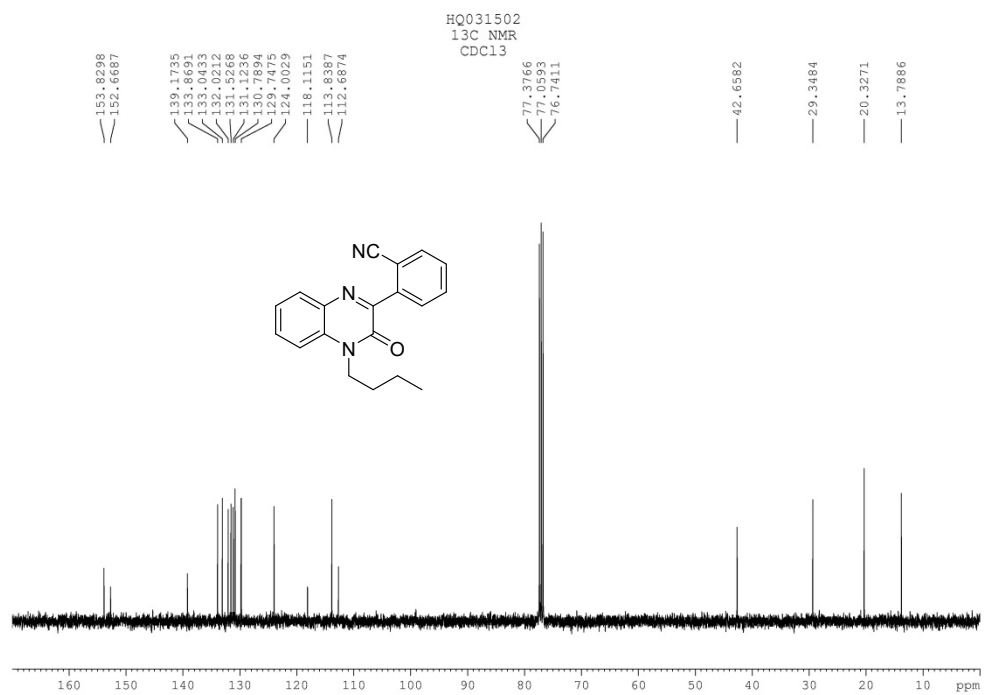

Fig. 8 <sup>13</sup>C NMR spectrum of compound 3da

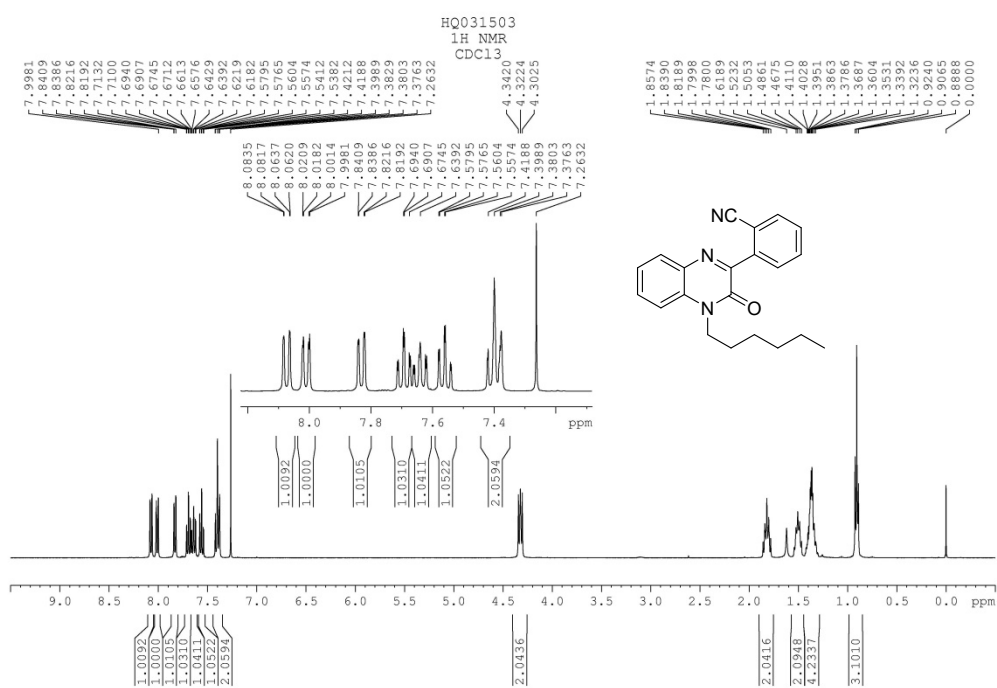

Fig. 9 <sup>1</sup>H NMR spectrum of compound 3ea

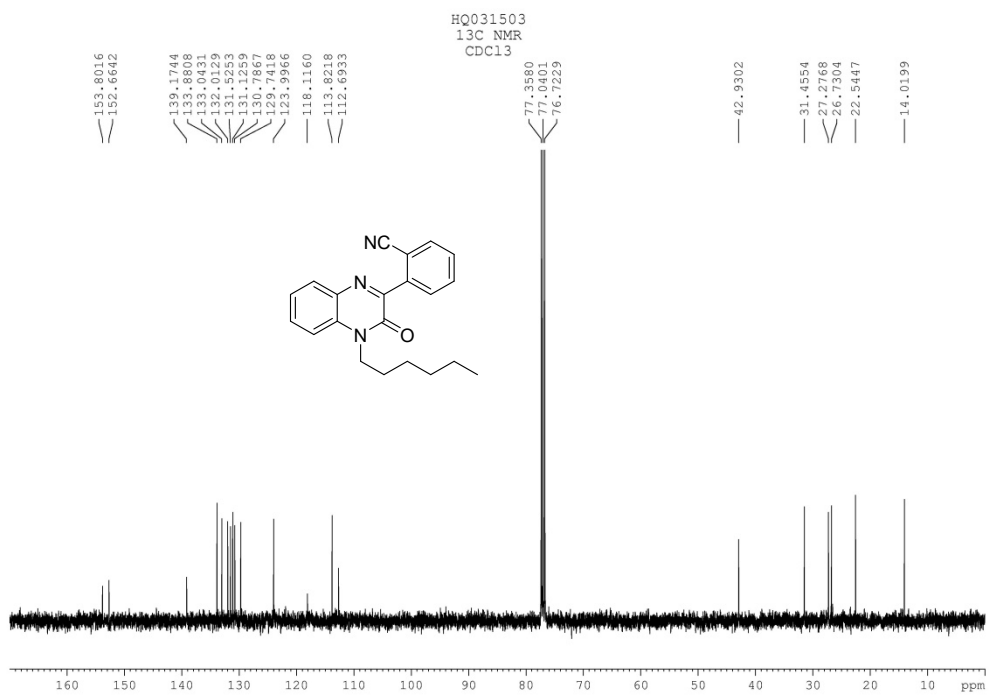

Fig. 10 <sup>13</sup>C NMR spectrum of compound 3ea



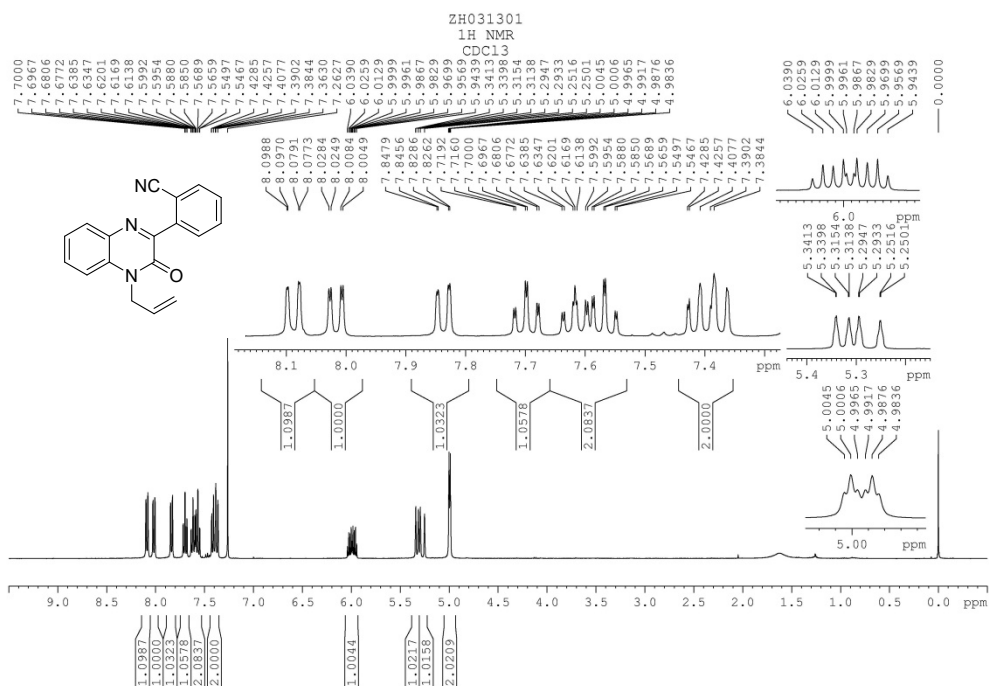

Fig. 11  $^1\text{H}$  NMR spectrum of compound 3fa

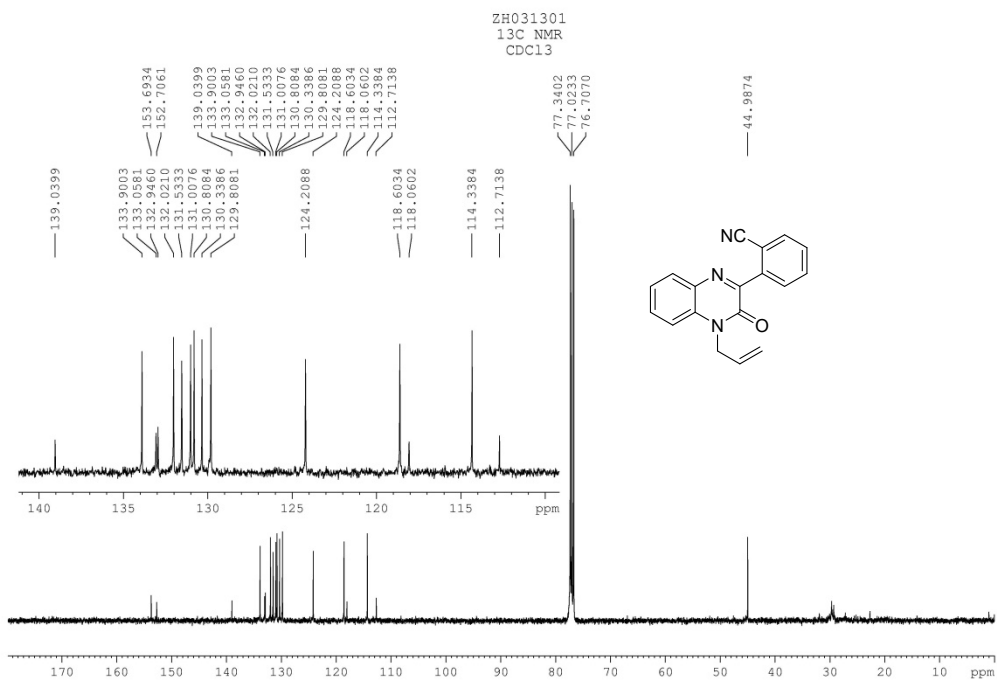

Fig. 12  $^{13}\text{C}$  NMR spectrum of compound 3fa

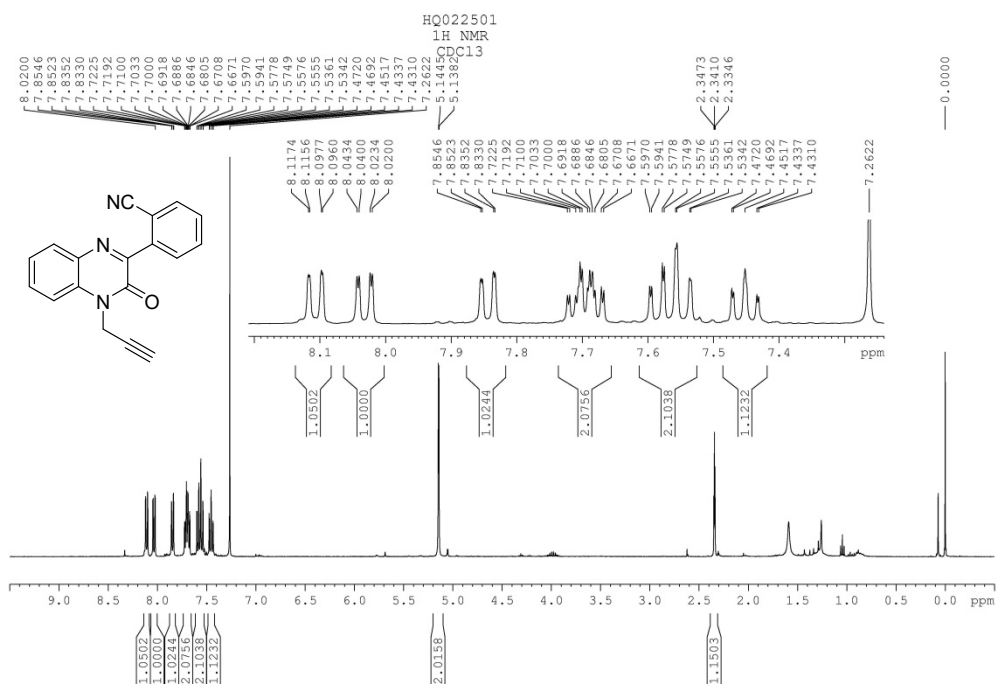

Fig. 13  $^1\text{H}$  NMR spectrum of compound 3ga

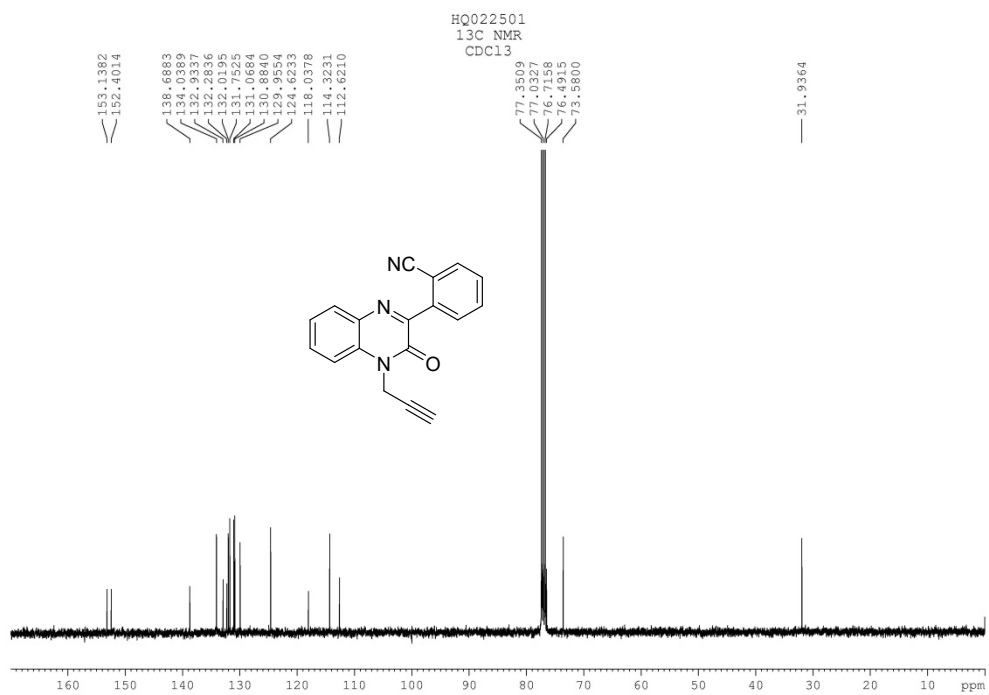

Fig. 14  $^{13}\text{C}$  NMR spectrum of compound 3ga

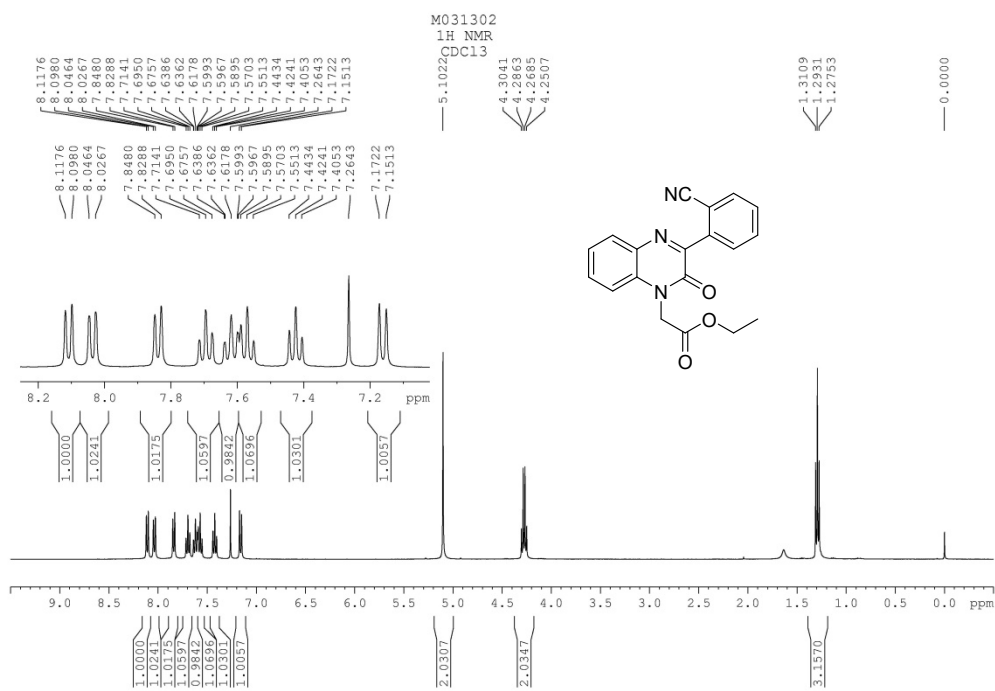

Fig. 15 <sup>1</sup>H NMR spectrum of compound 3ha

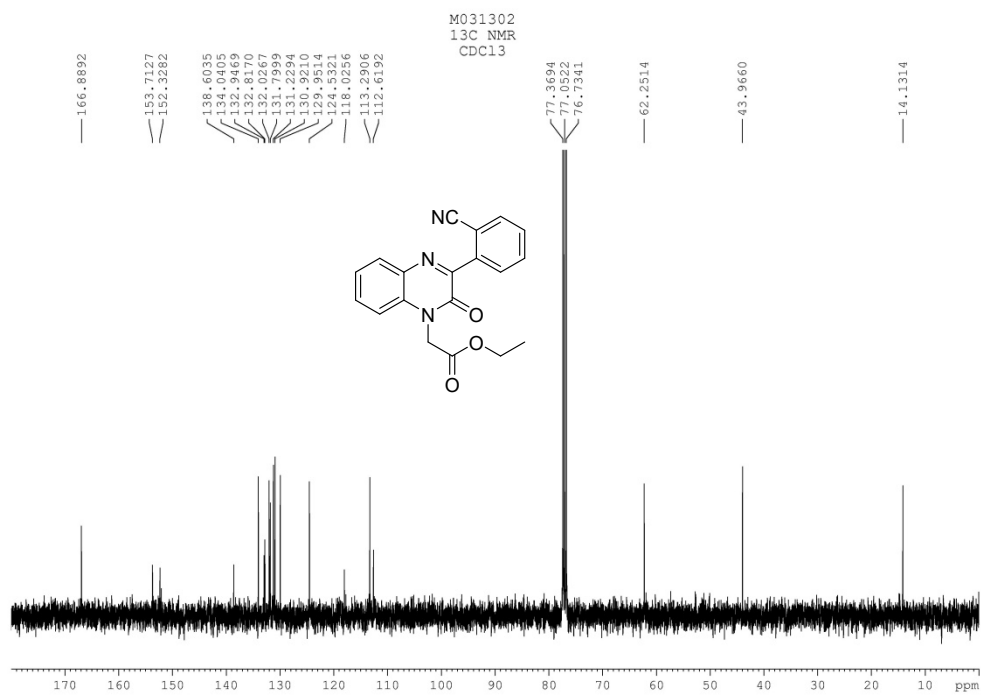

Fig. 16 <sup>13</sup>C NMR spectrum of compound 3ha

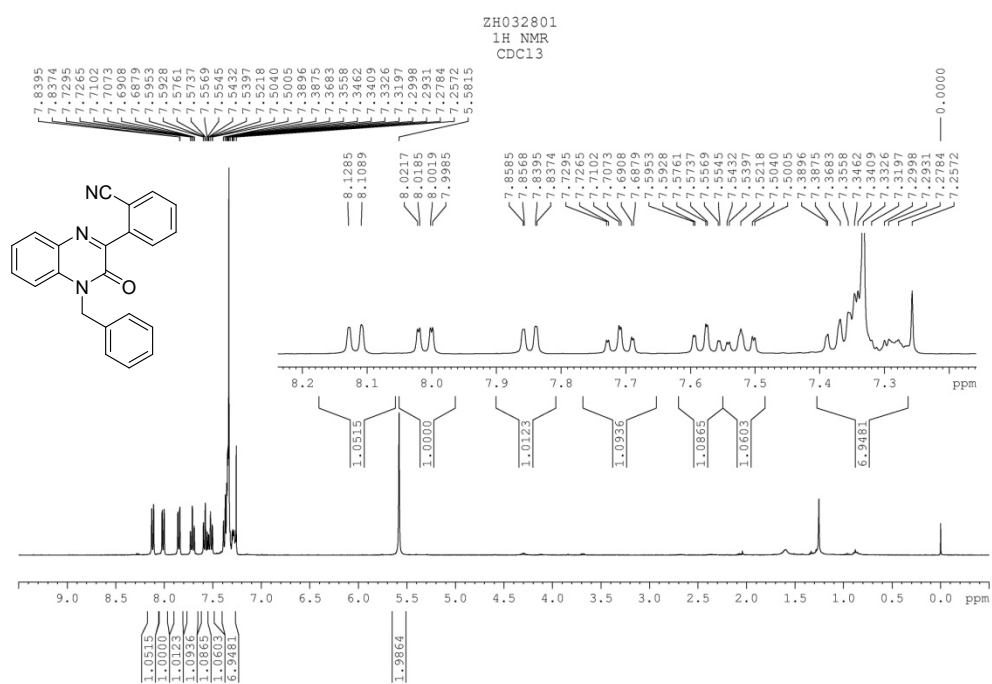

Fig. 17 <sup>1</sup>H NMR spectrum of compound 3ia

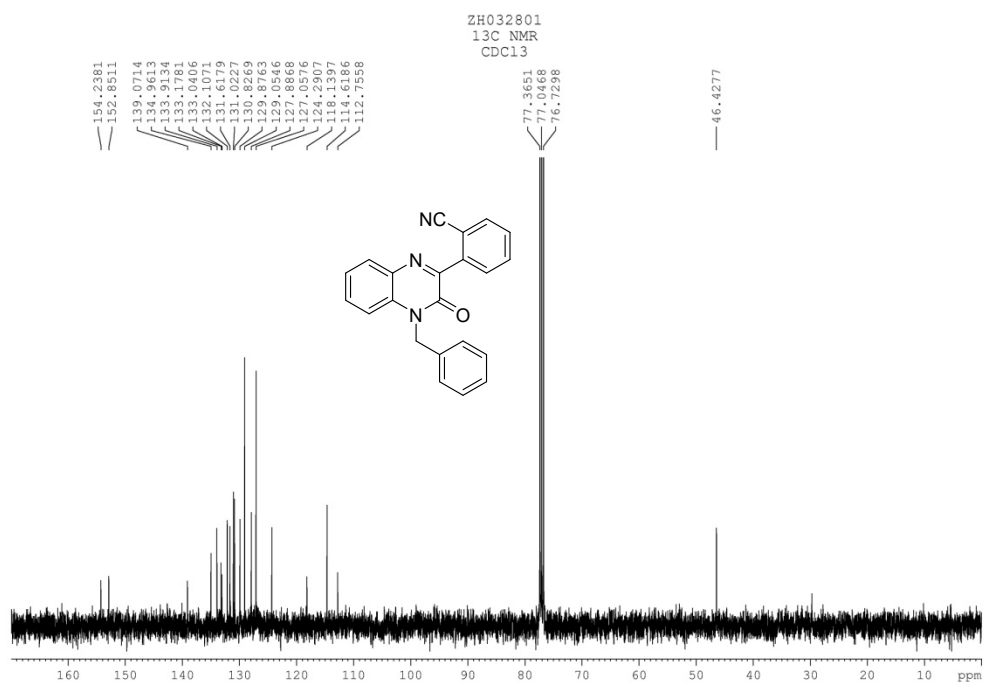

Fig. 18 <sup>13</sup>C NMR spectrum of compound 3ia

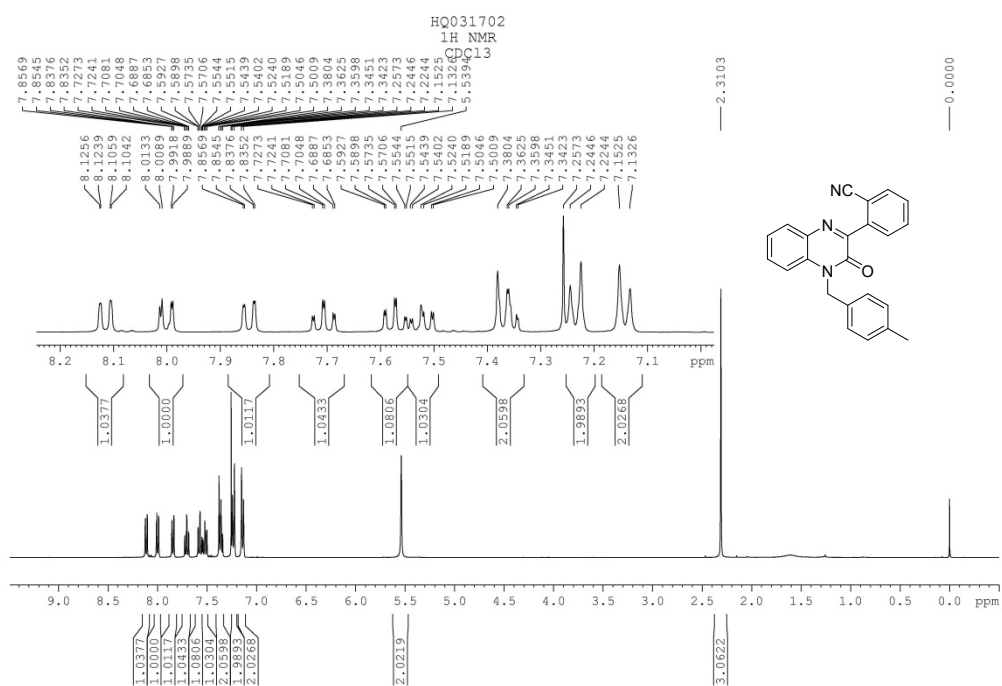

Fig. 19 <sup>1</sup>H NMR spectrum of compound 3ja

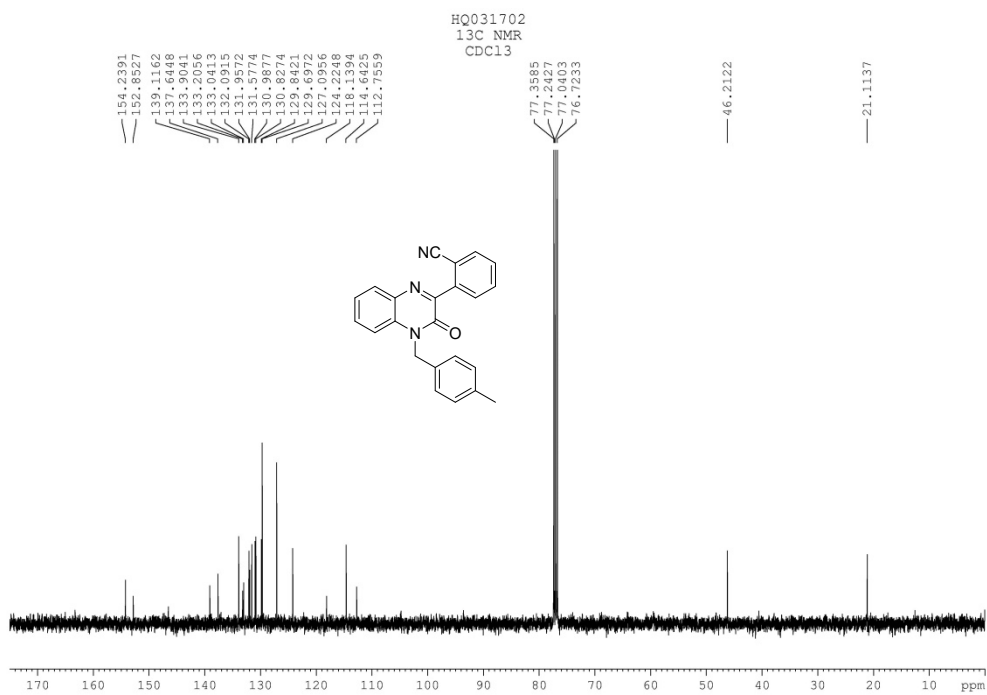

Fig. 20 <sup>13</sup>C NMR spectrum of compound 3ja

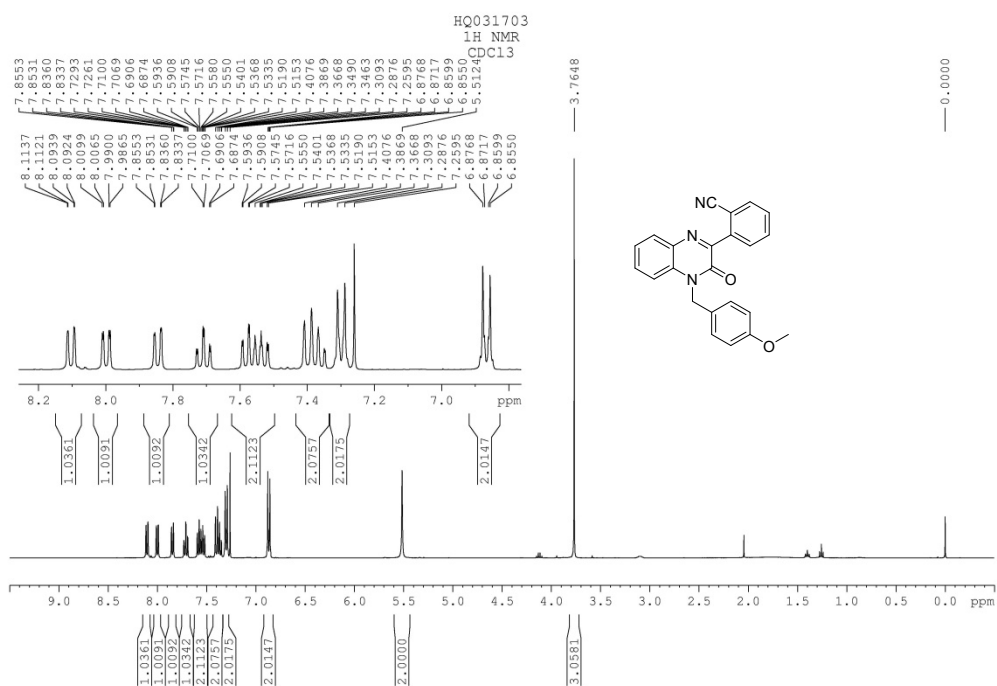

Fig. 21 <sup>1</sup>H NMR spectrum of compound 3ka

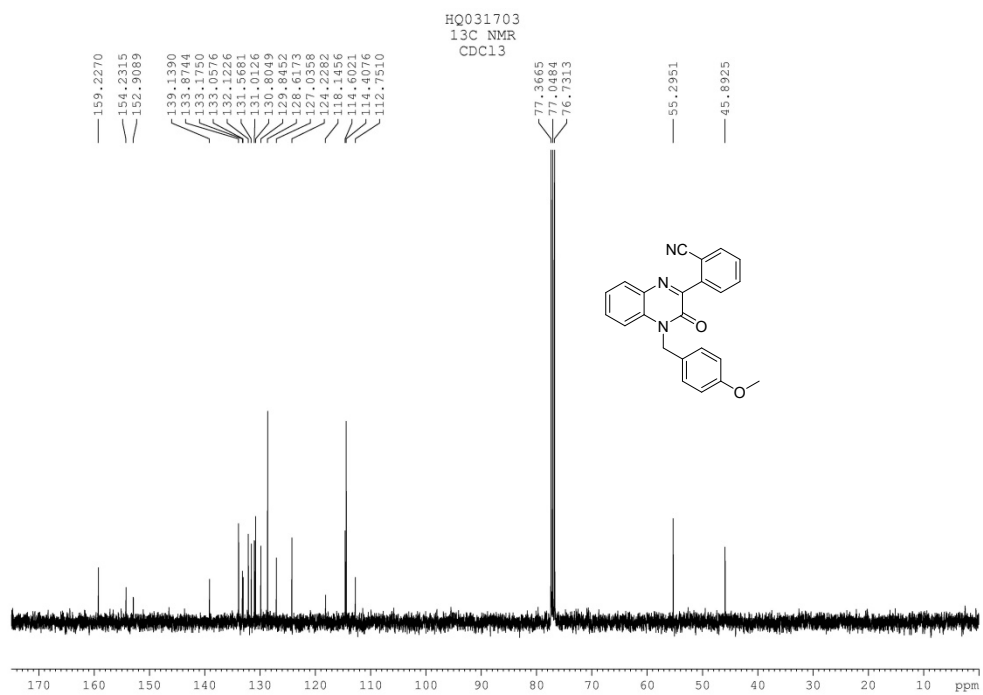

Fig. 22 <sup>13</sup>C NMR spectrum of compound 3ka

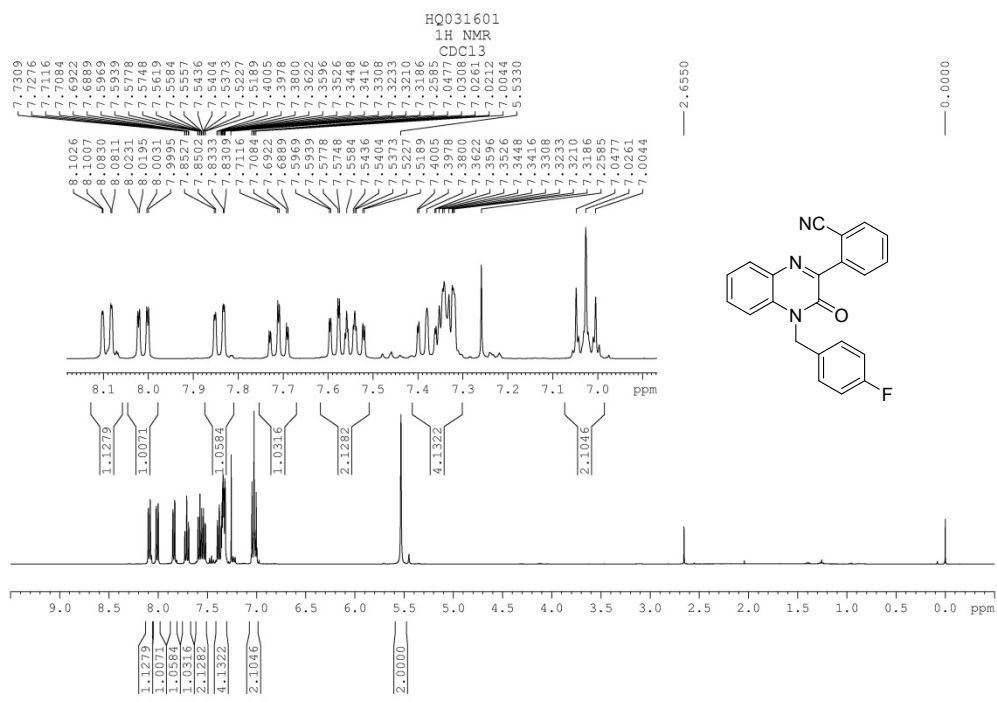

Fig. 23 <sup>1</sup>H NMR spectrum of compound 3la

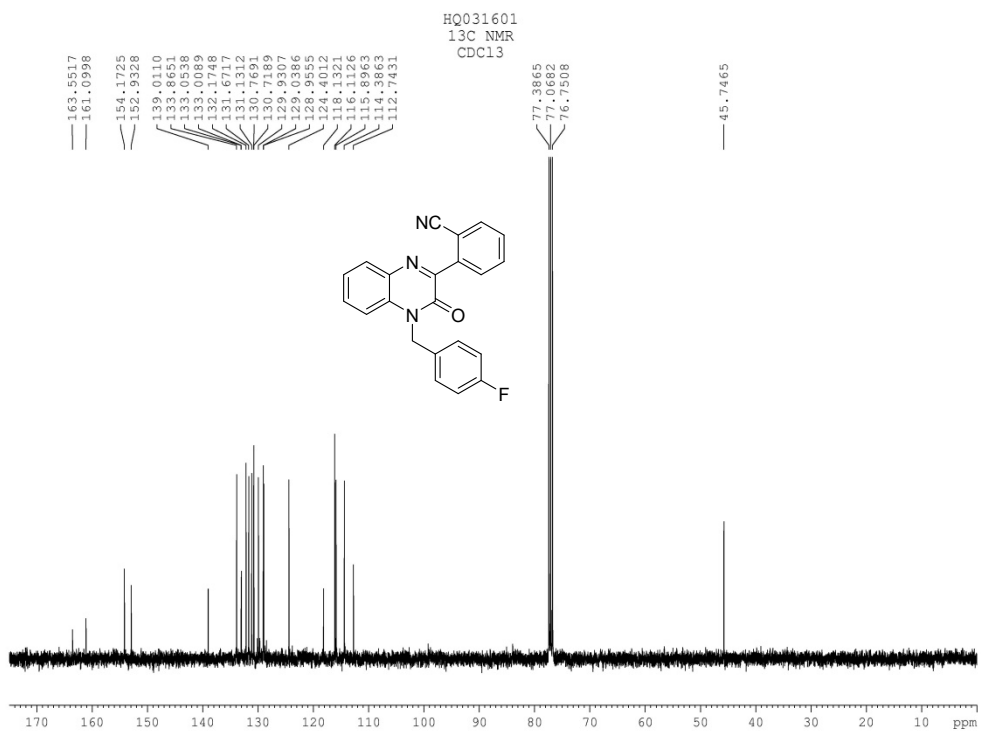

Fig. 24 <sup>13</sup>C NMR spectrum of compound 3la

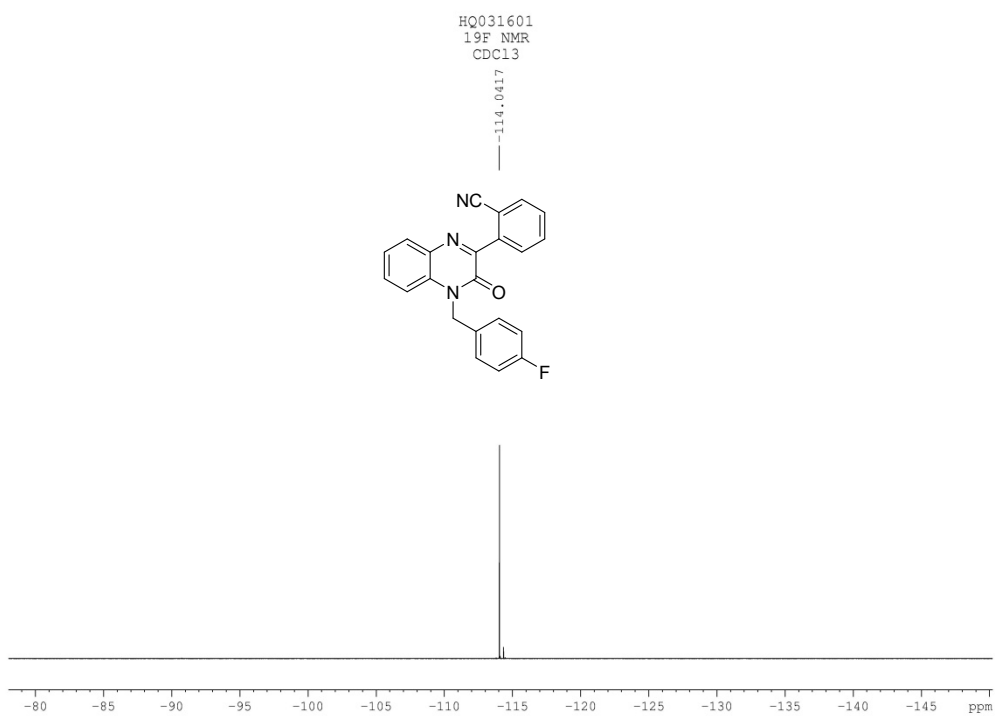

Fig. 25 <sup>19</sup>F NMR spectrum of compound 3la

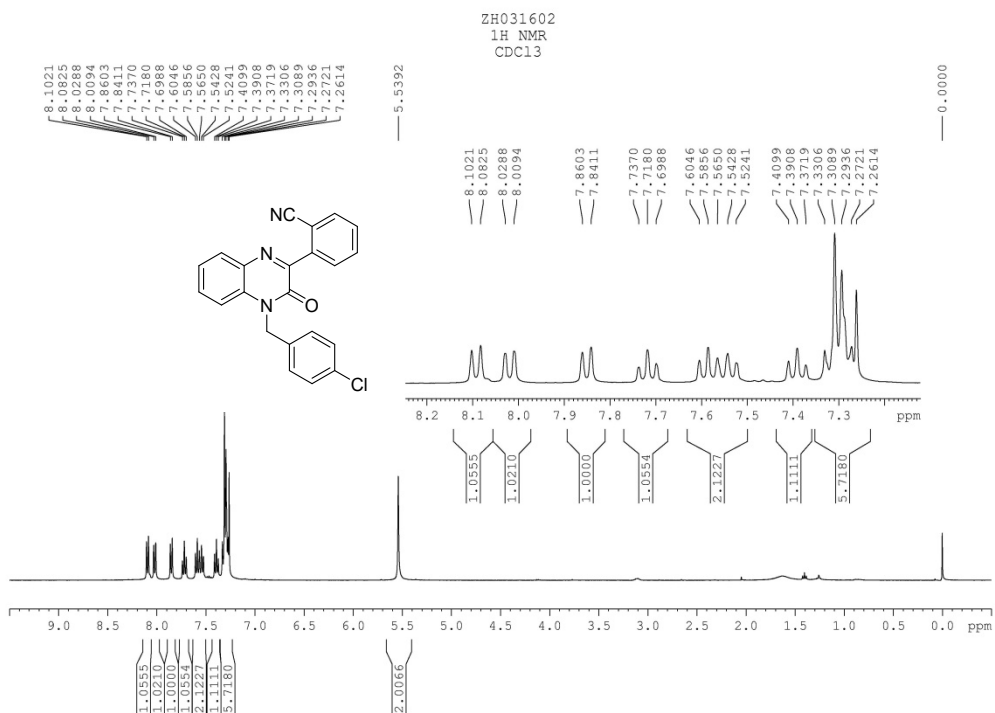

Fig. 26 <sup>1</sup>H NMR spectrum of compound 3ma



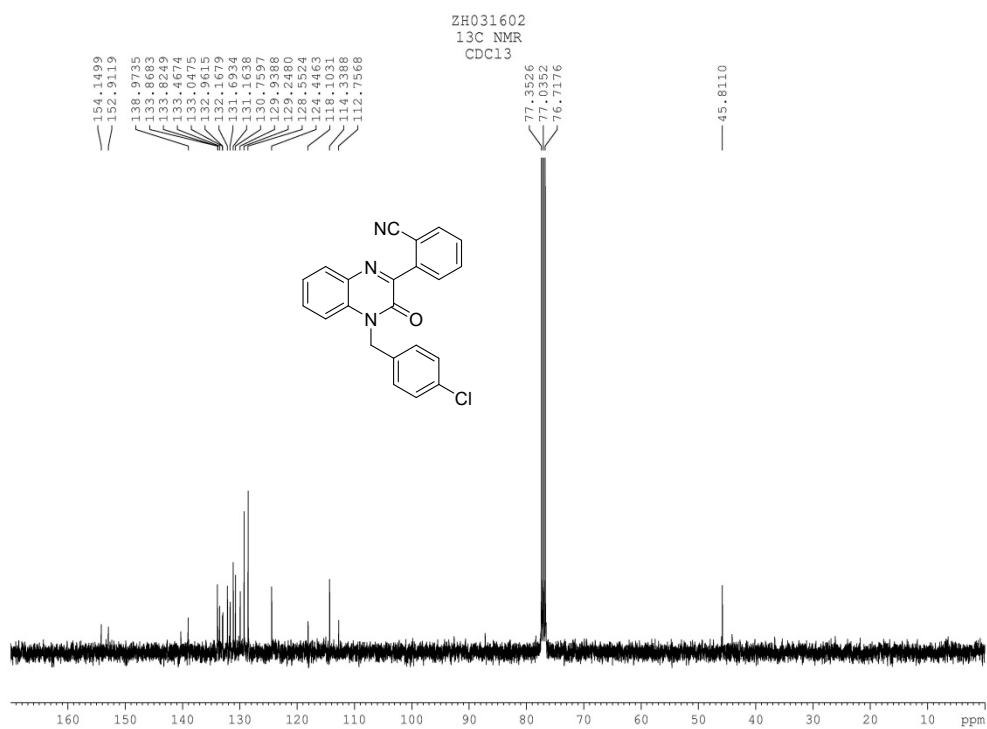

Fig. 27 <sup>13</sup>C NMR spectrum of compound 3ma

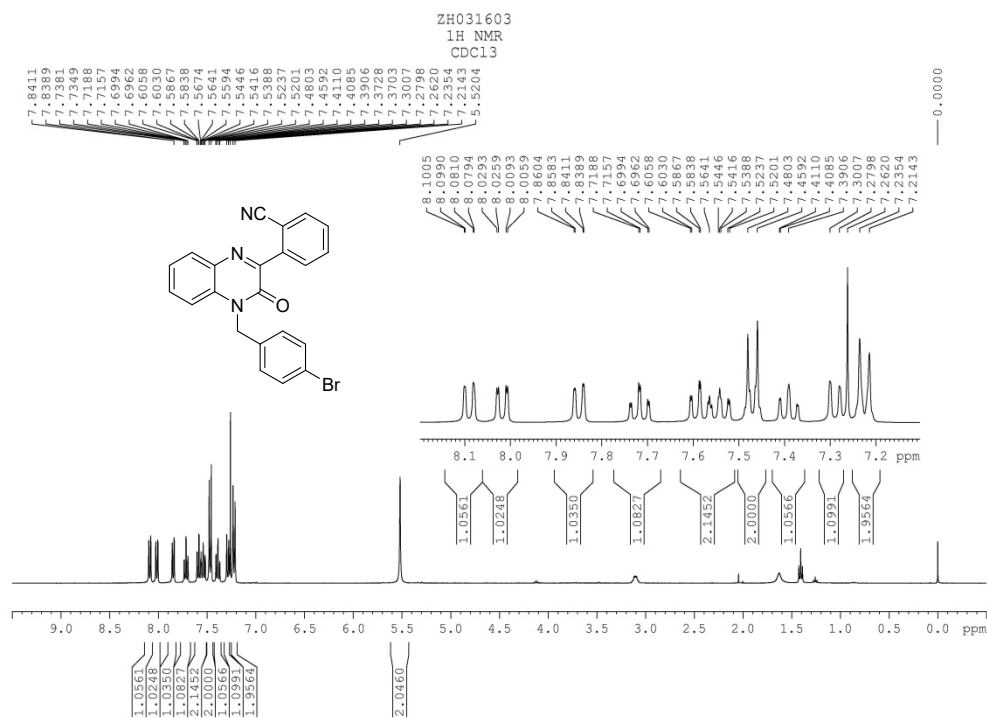

Fig. 28 <sup>1</sup>H NMR spectrum of compound 3na

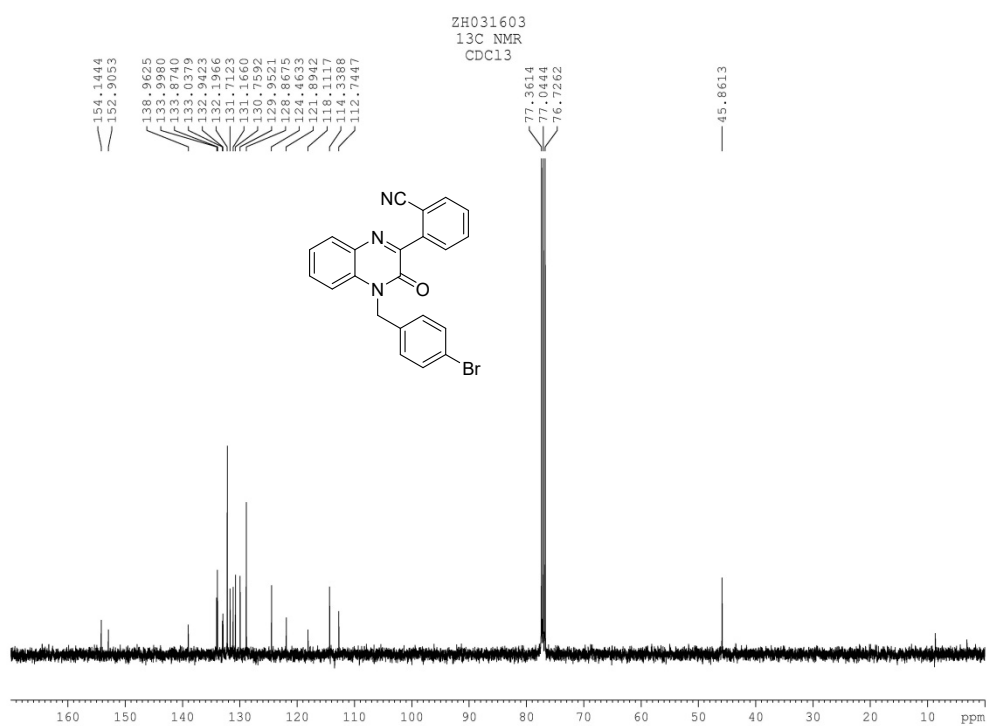

Fig. 29 <sup>13</sup>C NMR spectrum of compound 3na

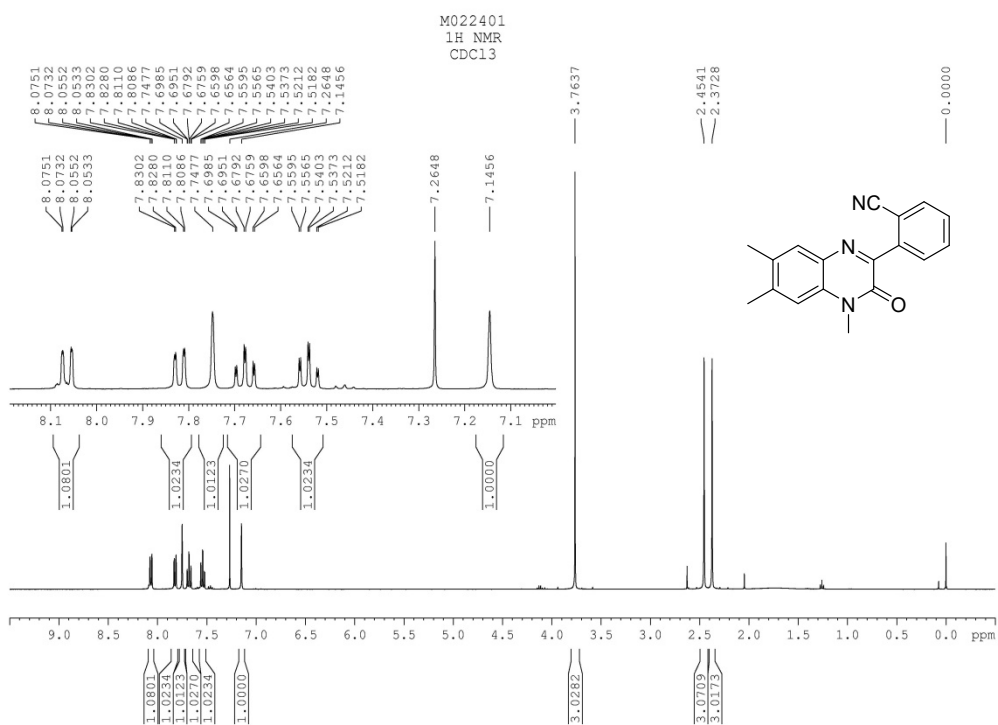

Fig. 30 <sup>1</sup>H NMR spectrum of compound 3oa

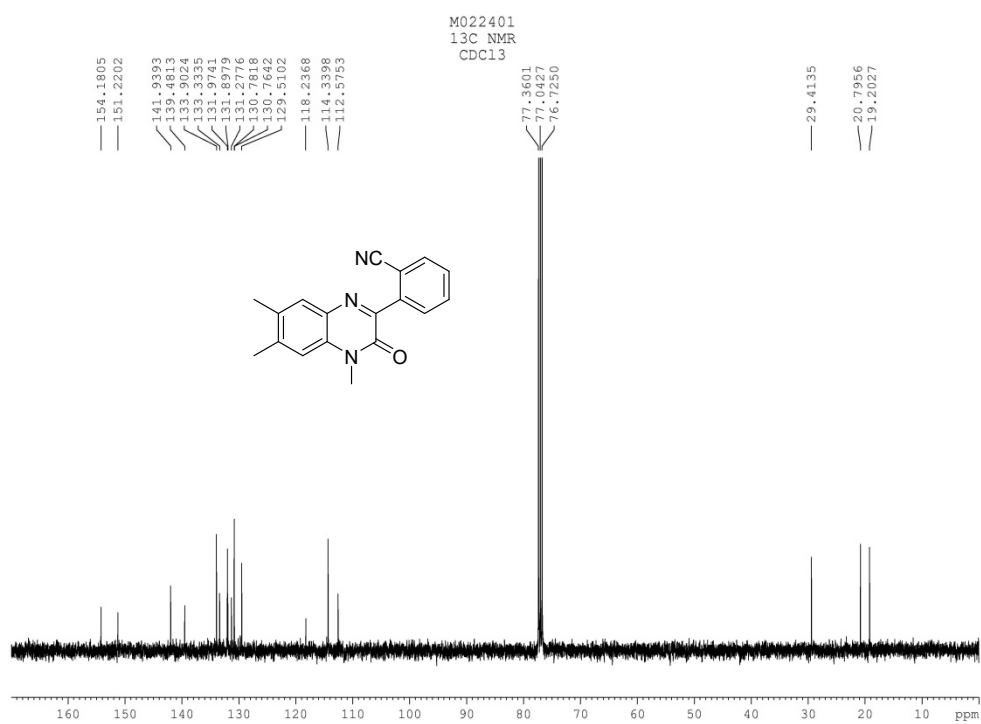

Fig. 31 <sup>13</sup>C NMR spectrum of compound 30a

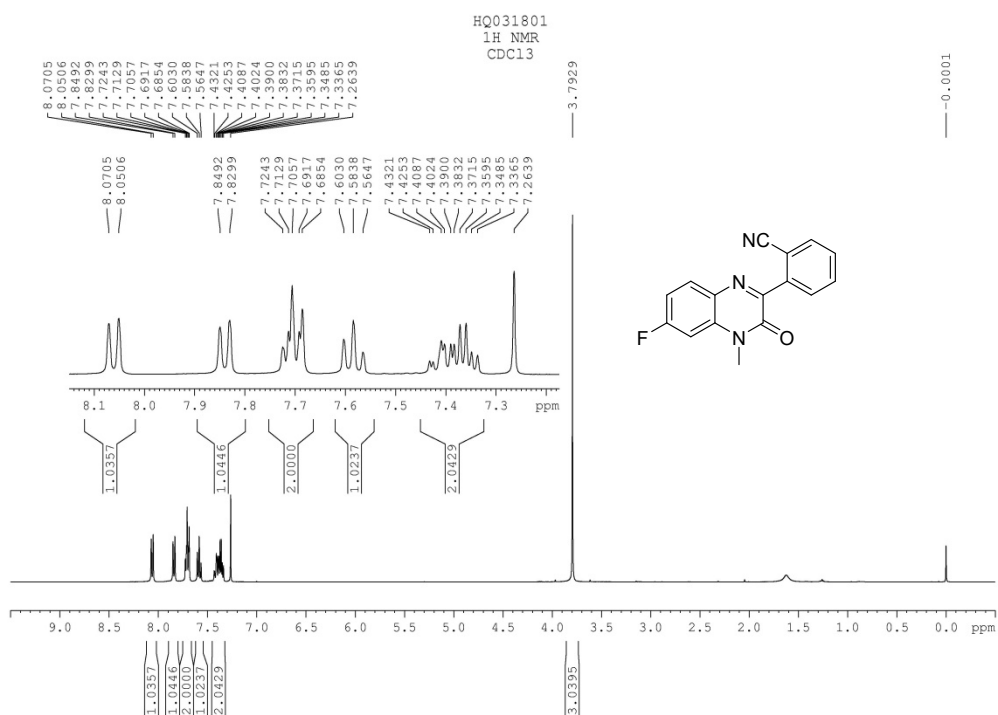

Fig. 32 <sup>1</sup>H NMR spectrum of compound 30a

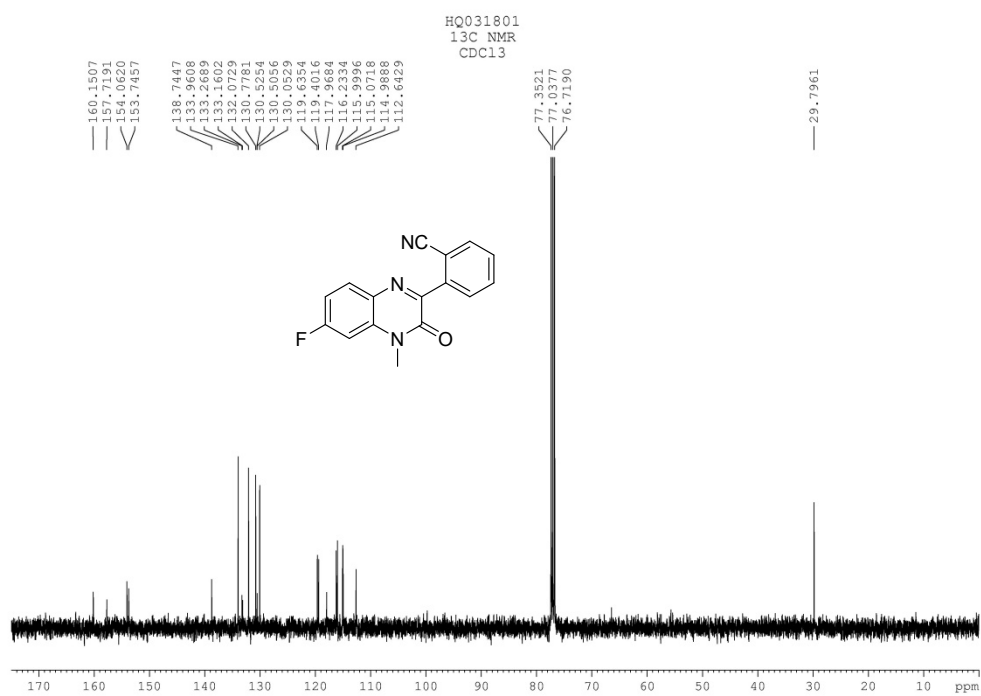

Fig. 33 <sup>13</sup>C NMR spectrum of compound 3pa

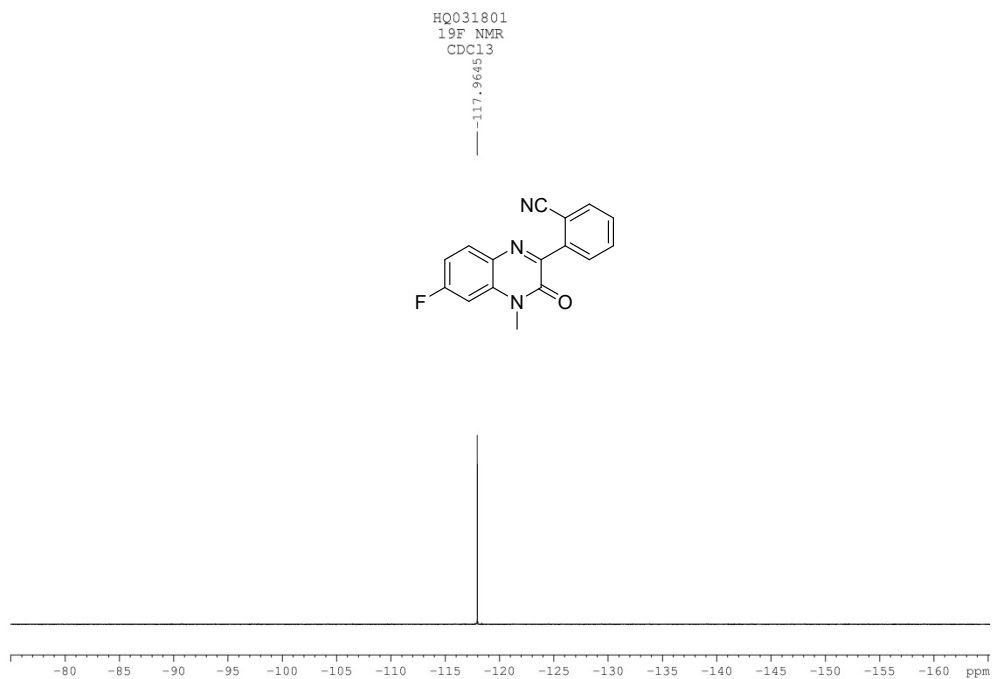

Fig. 34 <sup>19</sup>F NMR spectrum of compound 3pa

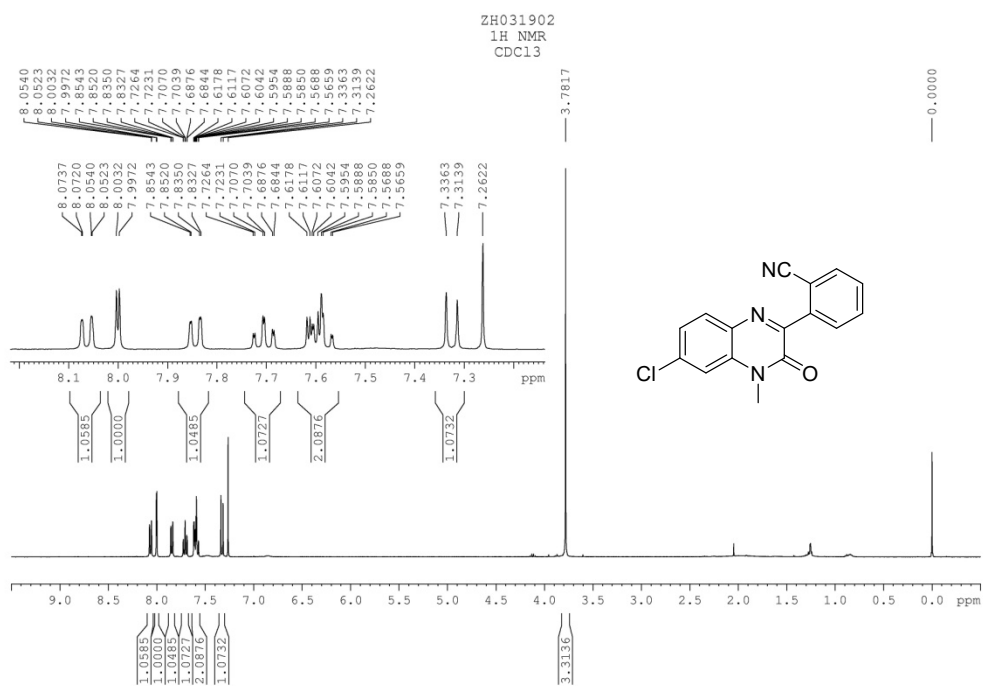

Fig. 35 <sup>1</sup>H NMR spectrum of compound 3qa

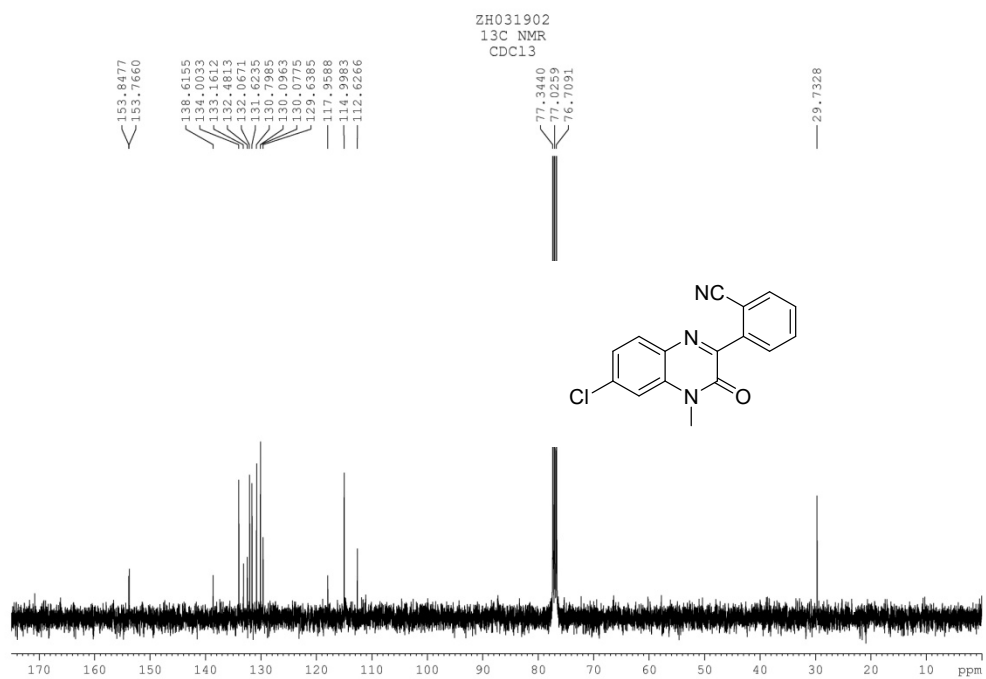

Fig. 36 <sup>13</sup>C NMR spectrum of compound 3qa

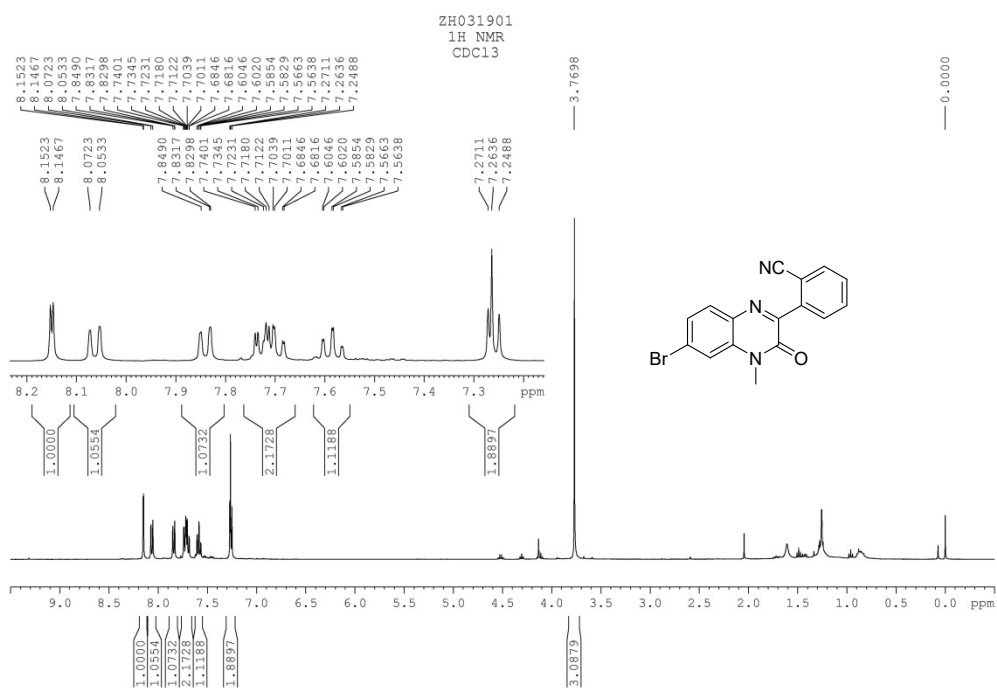

Fig. 37 <sup>1</sup>H NMR spectrum of compound 3ra

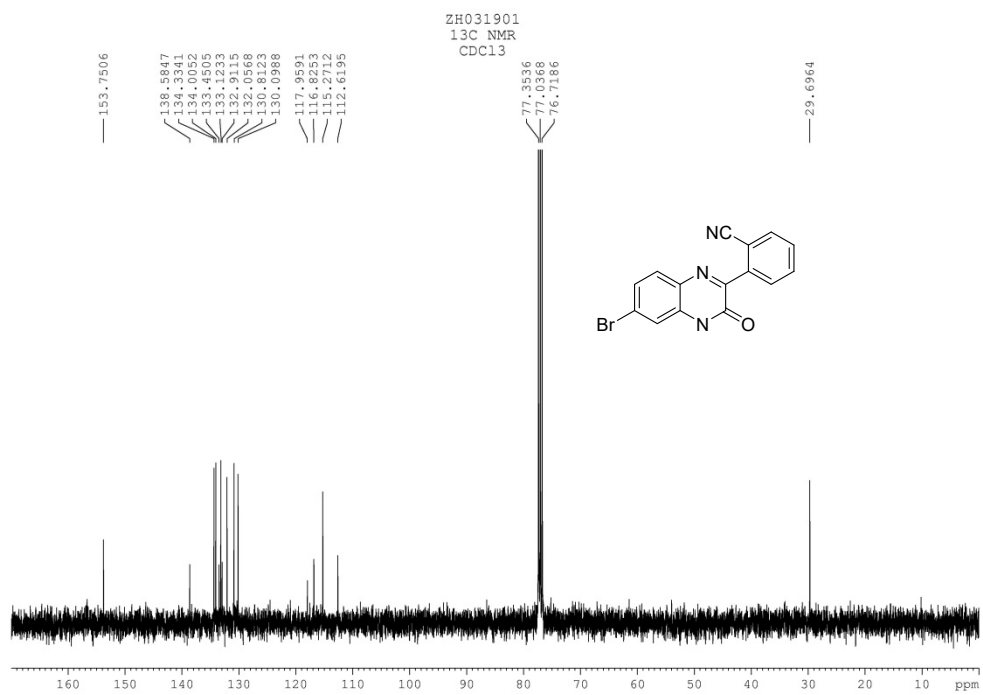

Fig. 38 <sup>13</sup>C NMR spectrum of compound 3ra

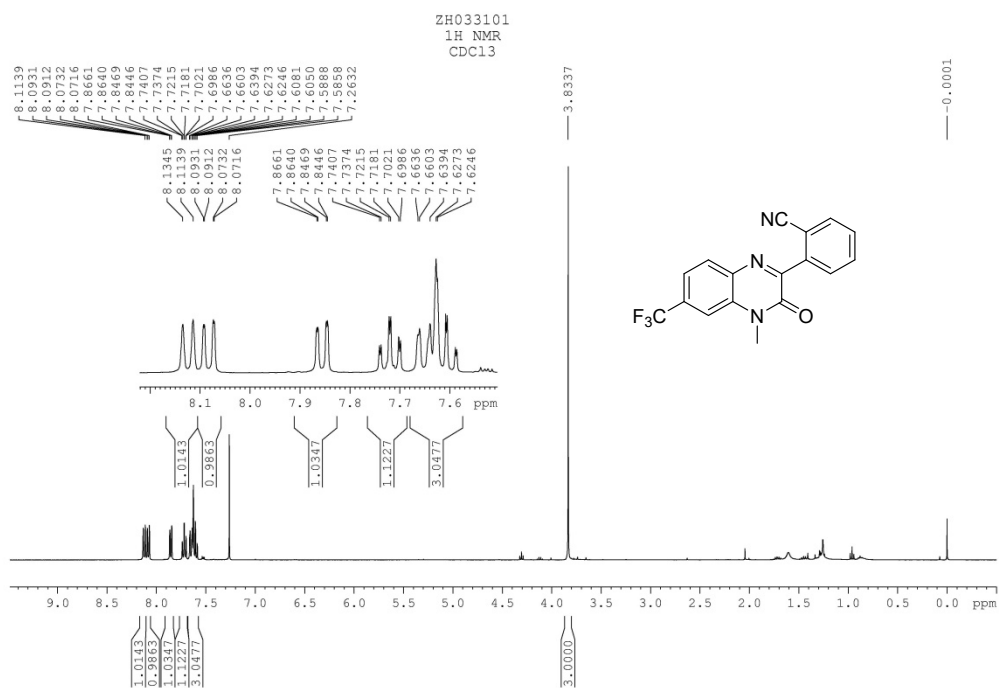

Fig. 39 <sup>1</sup>H NMR spectrum of compound 3sa

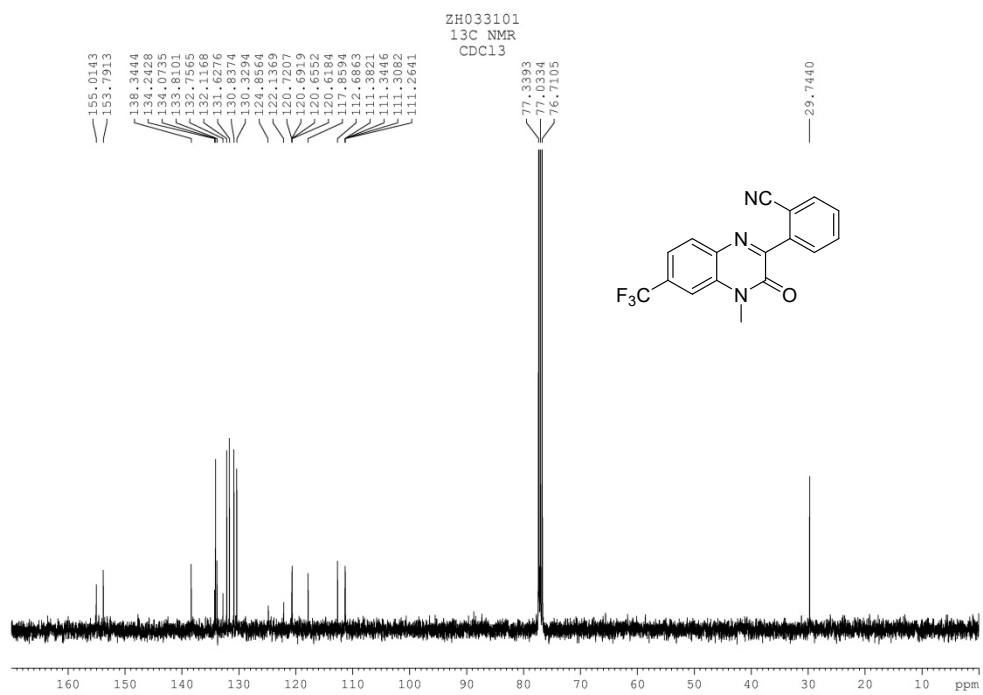

Fig. 40 <sup>13</sup>C NMR spectrum of compound 3sa

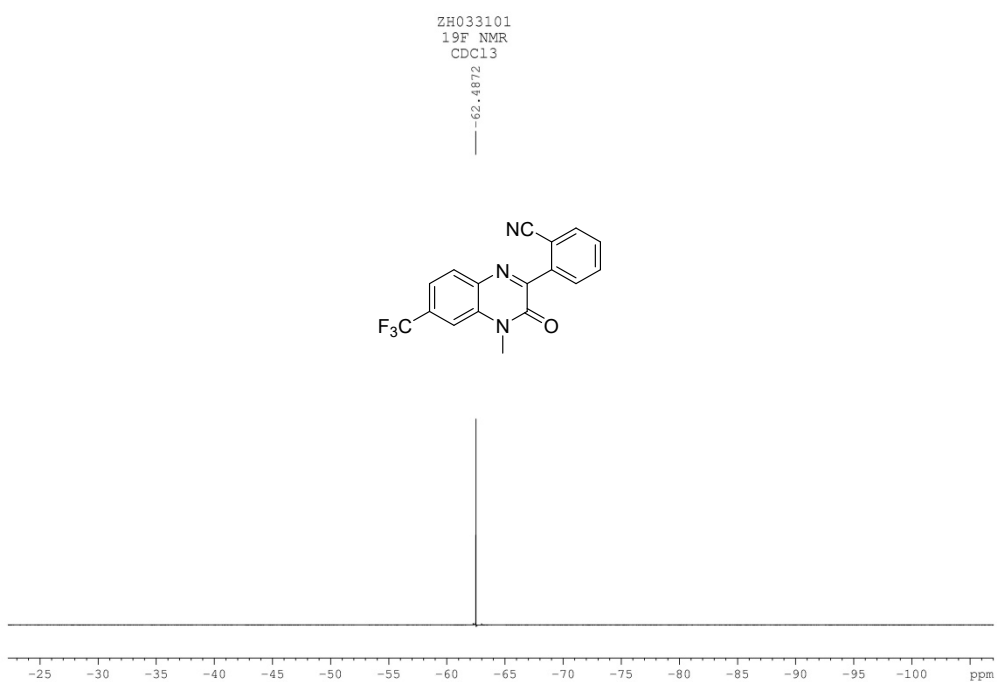

Fig. 41 <sup>19</sup>F NMR spectrum of compound 3sa

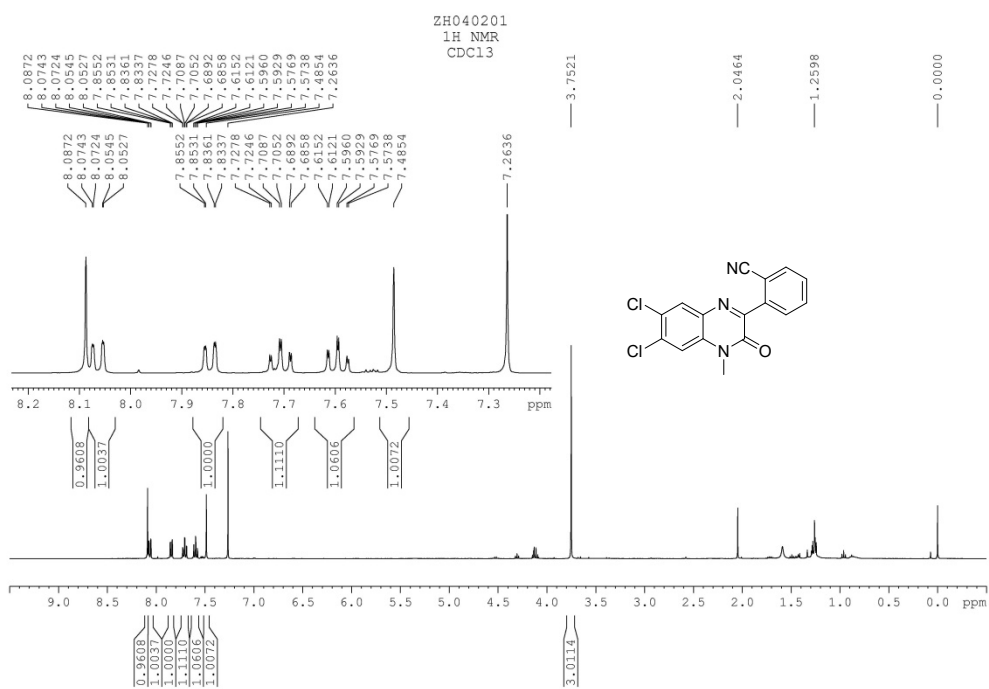

Fig. 42 <sup>1</sup>H NMR spectrum of compound 3ta



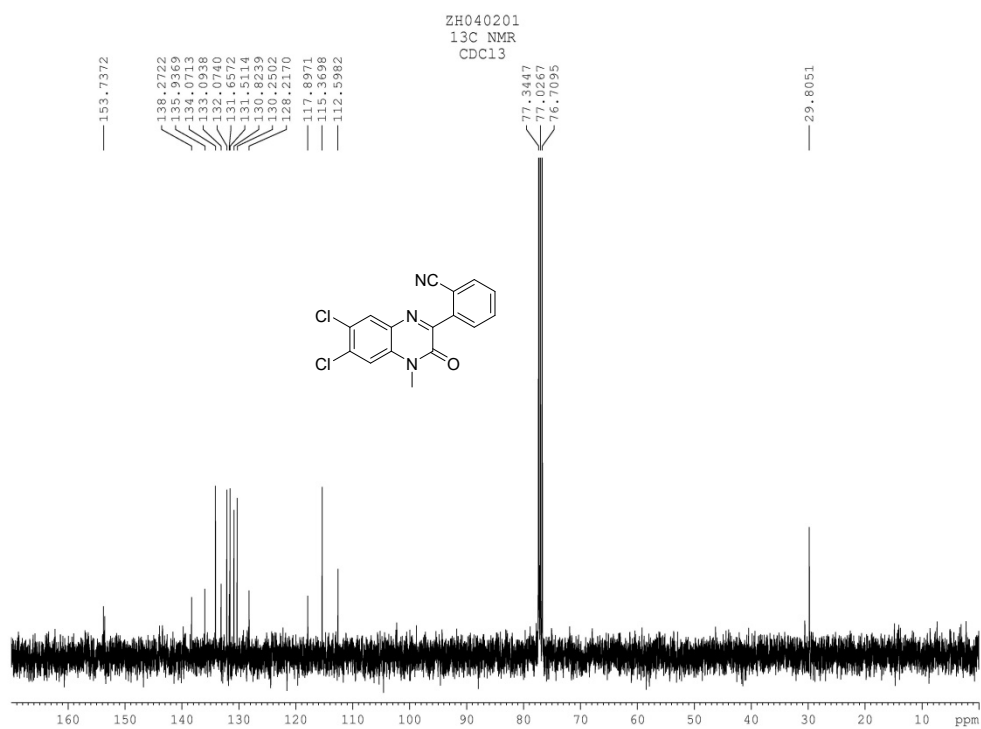

Fig. 43 <sup>13</sup>C NMR spectrum of compound 3ta

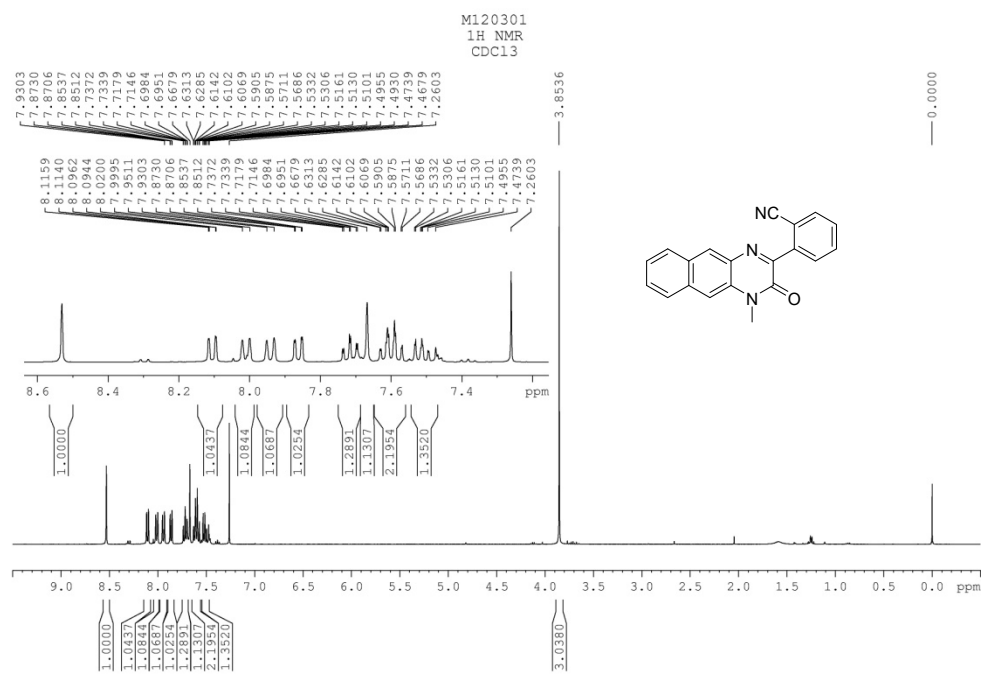

Fig. 44 <sup>1</sup>H NMR spectrum of compound 3ua

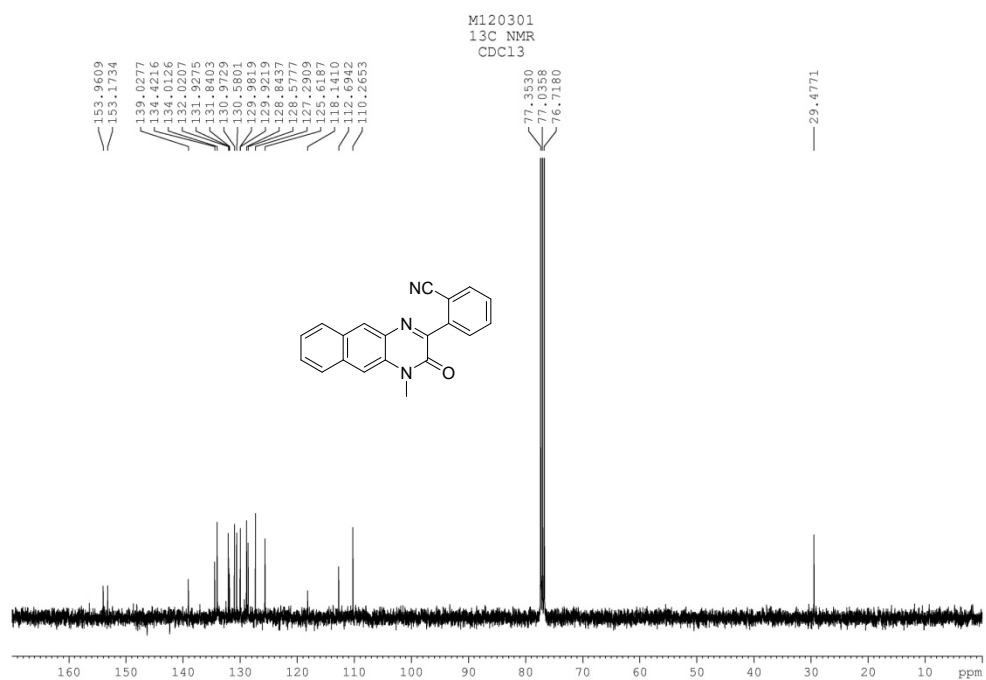

Fig. 45 <sup>13</sup>C NMR spectrum of compound **3ua**

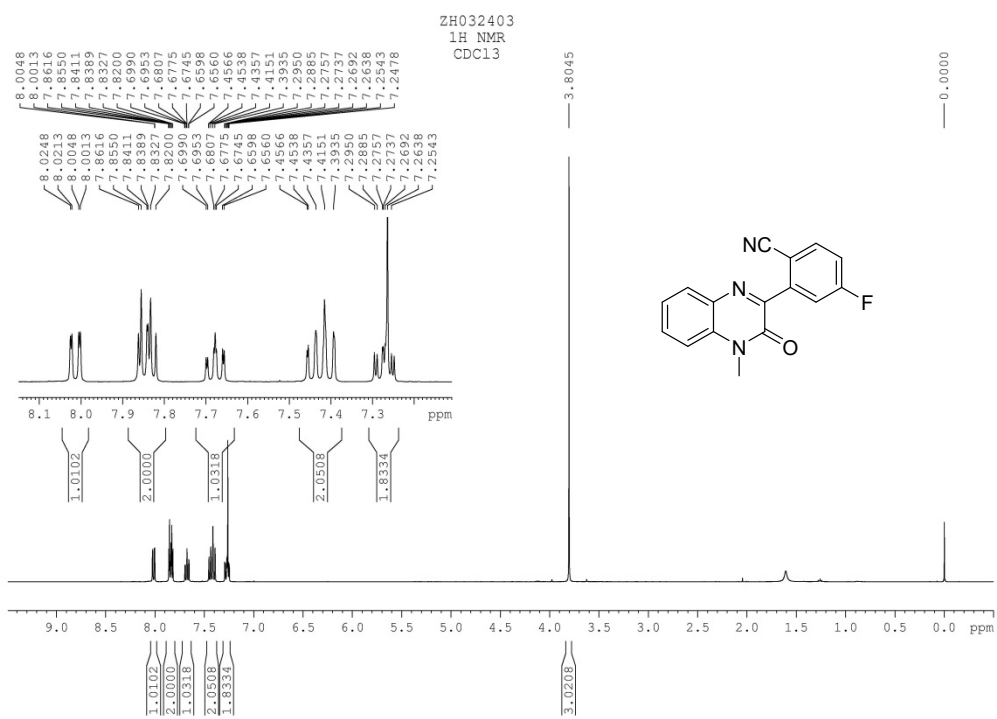

Fig. 46 <sup>1</sup>H NMR spectrum of compound **3ab**

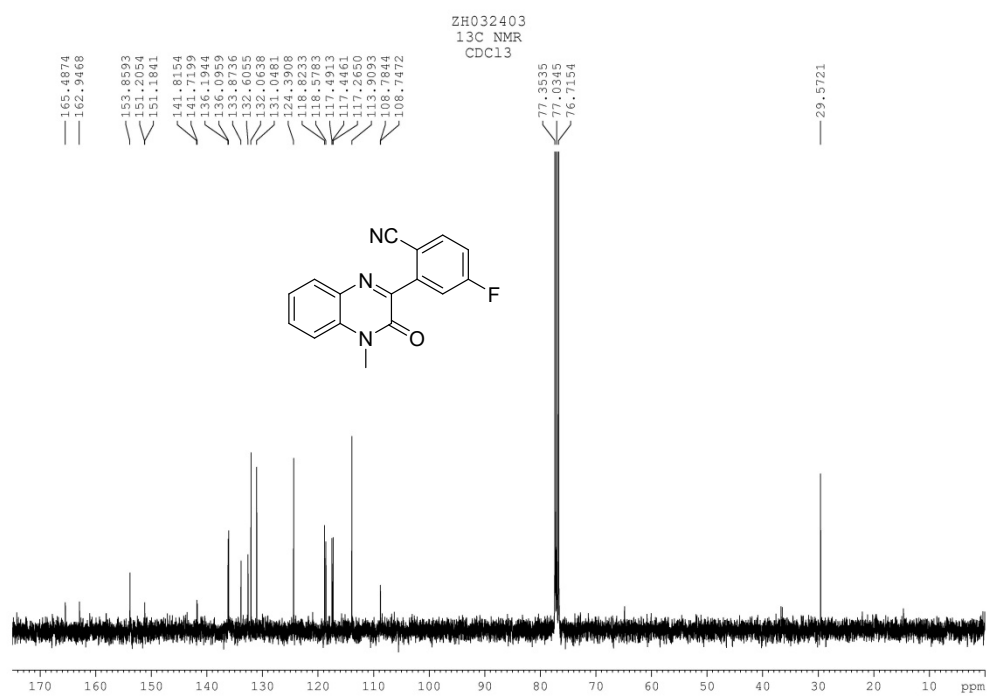

Fig. 47 <sup>13</sup>C NMR spectrum of compound 3ab

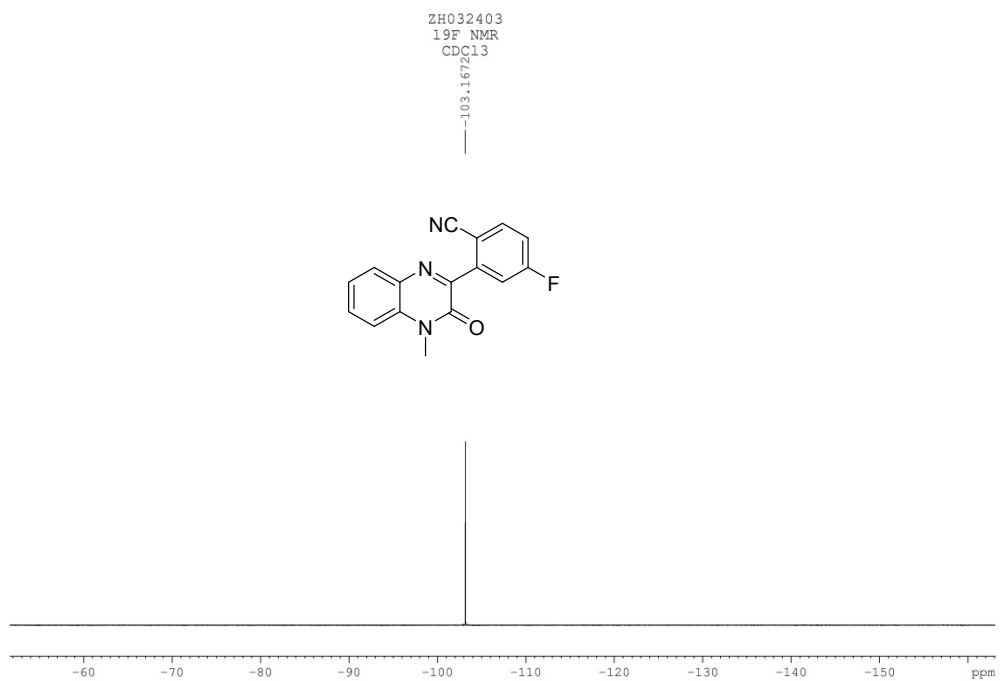

Fig. 48 <sup>19</sup>F NMR spectrum of compound 3ab

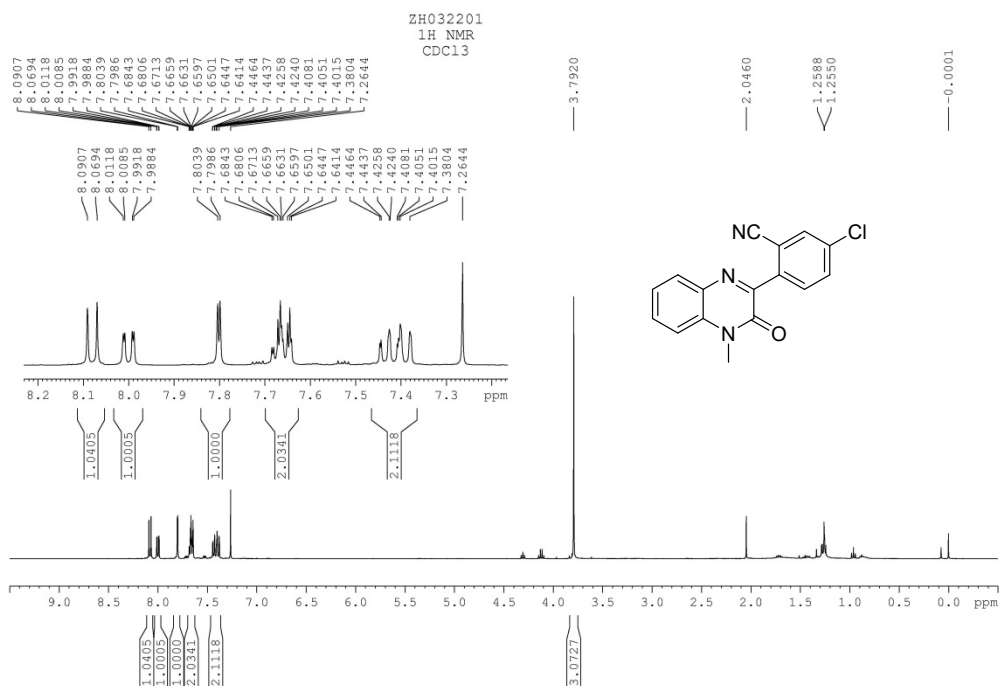

Fig. 49 <sup>1</sup>H NMR spectrum of compound 3ac

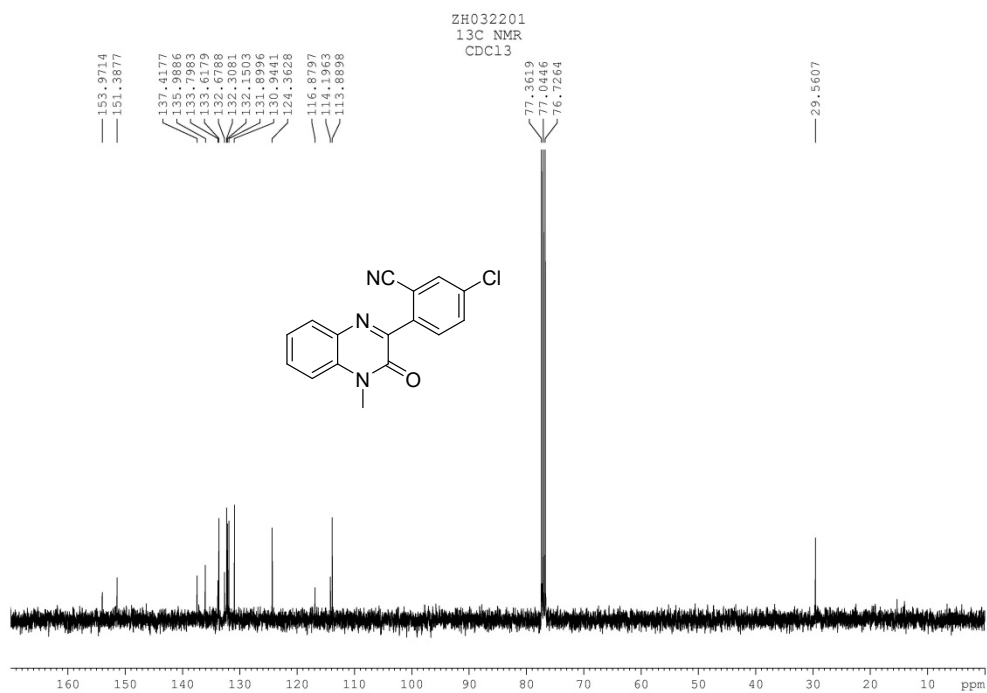

Fig. 50 <sup>13</sup>C NMR spectrum of compound 3ac

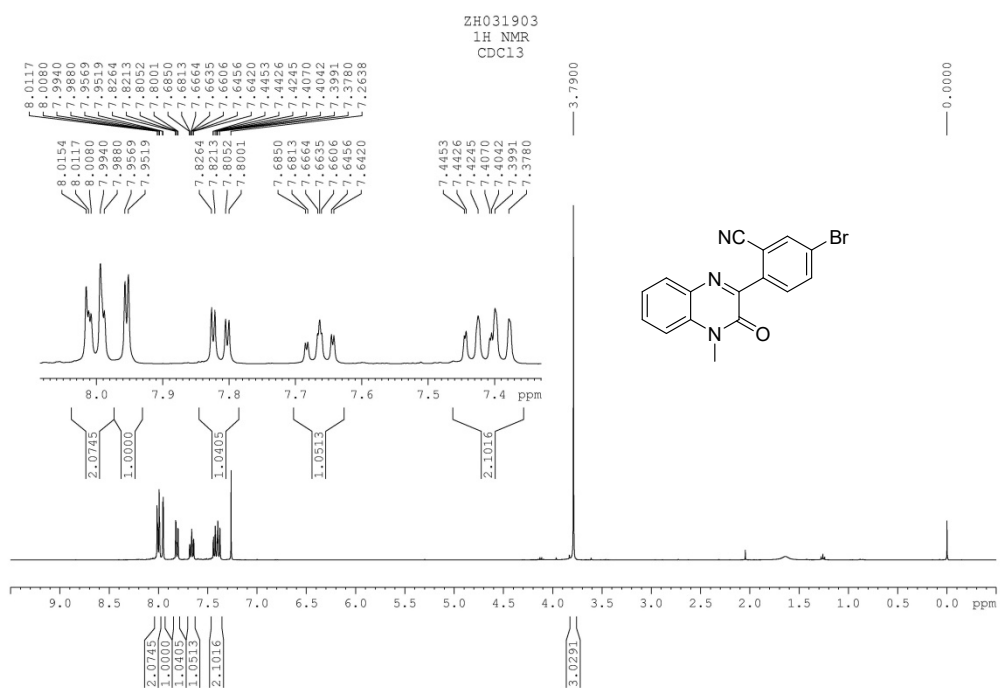

Fig. 51 <sup>1</sup>H NMR spectrum of compound 3ad

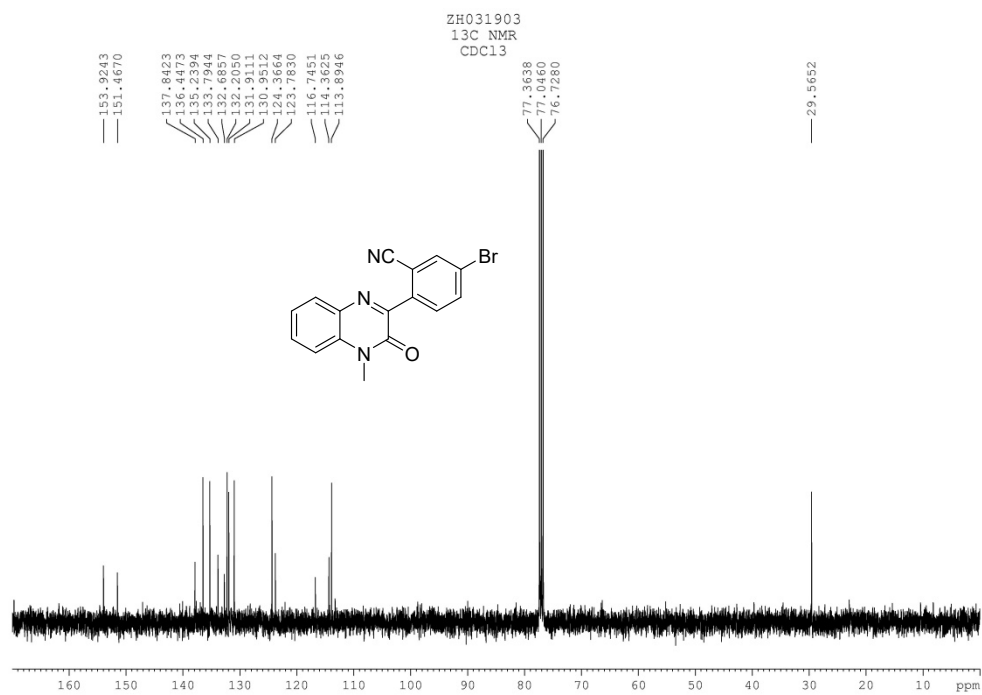

Fig. 52 <sup>13</sup>C NMR spectrum of compound 3ad

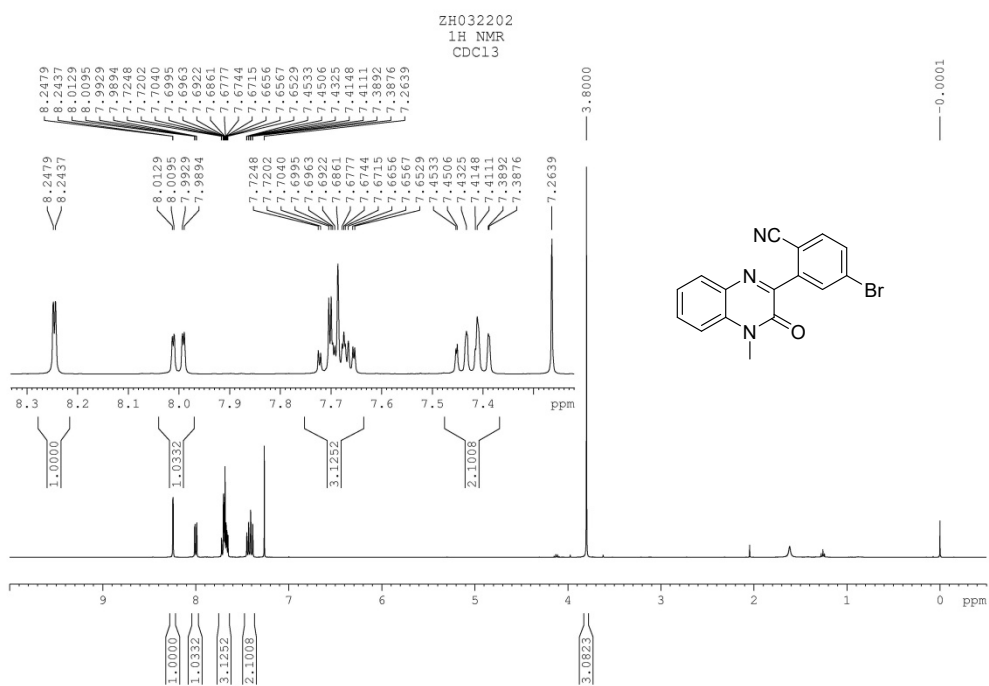

Fig. 53 <sup>1</sup>H NMR spectrum of compound 3ae

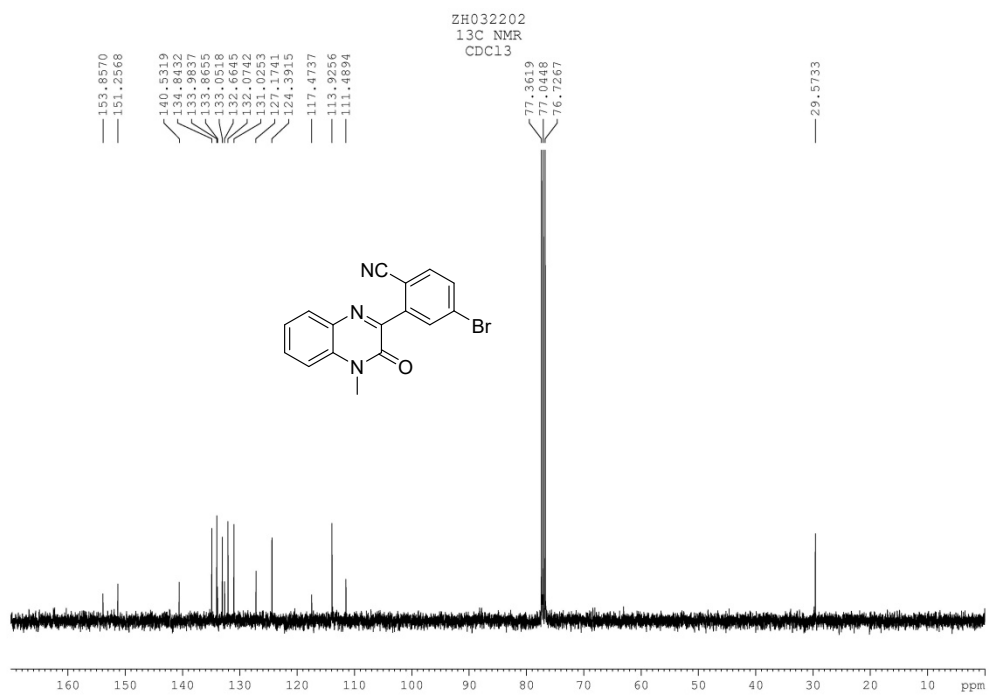

Fig. 54 <sup>13</sup>C NMR spectrum of compound 3ae

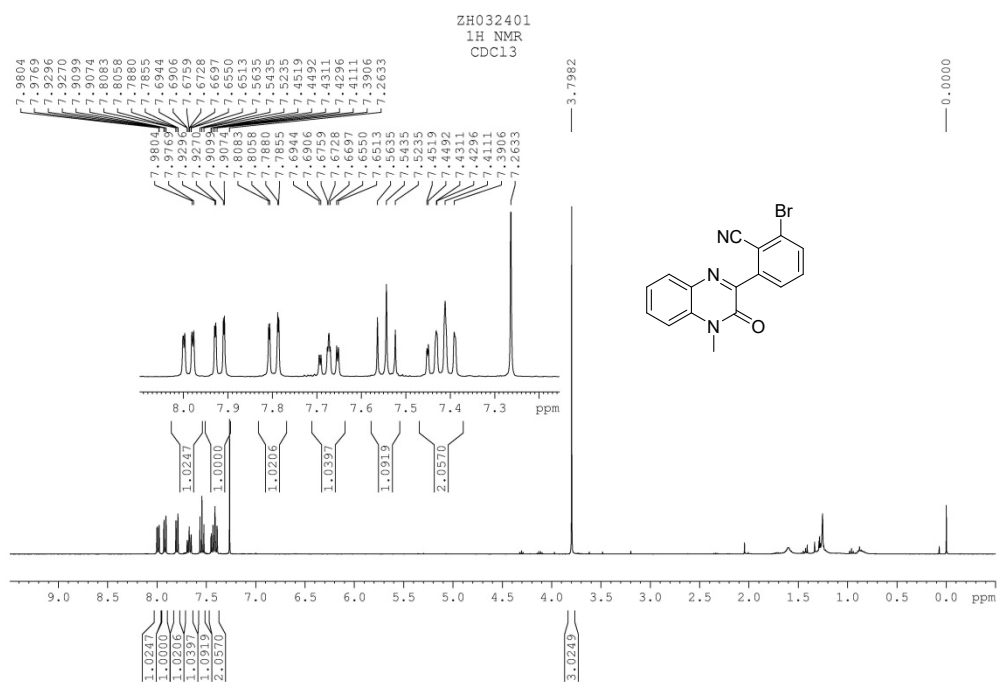

Fig. 55 <sup>1</sup>H NMR spectrum of compound 3af

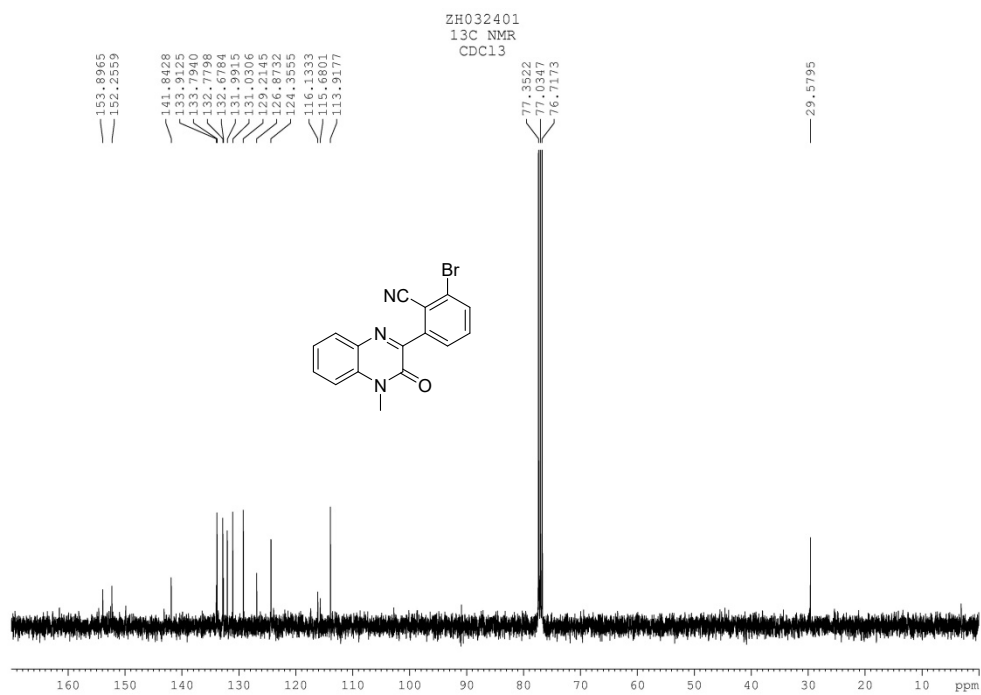

Fig. 56 <sup>13</sup>C NMR spectrum of compound 3af

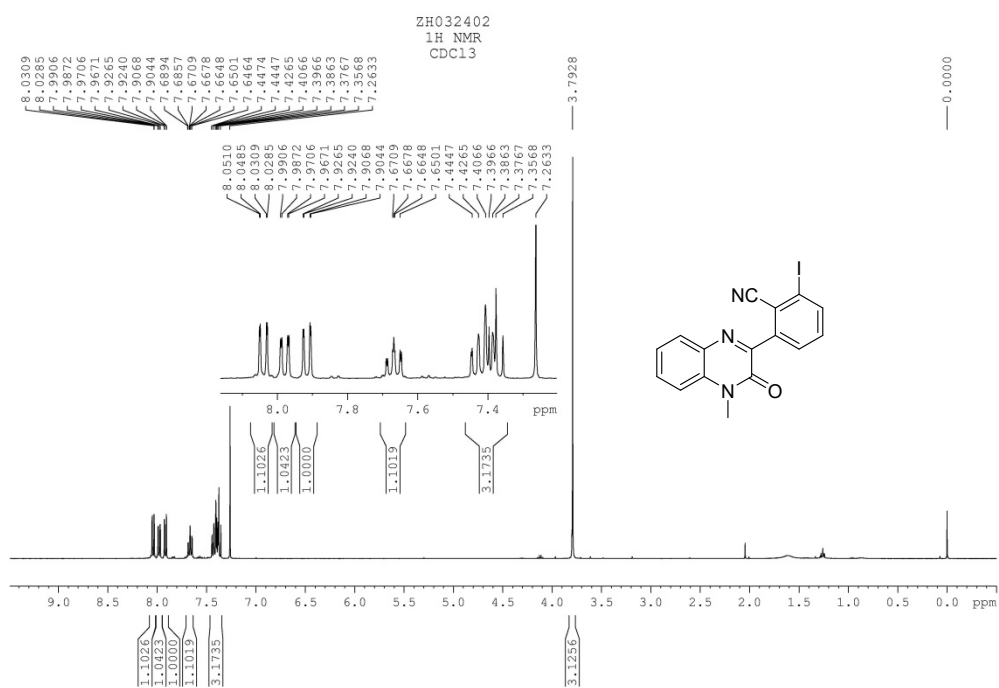

**Fig. 57** <sup>1</sup>H NMR spectrum of compound **3ag**

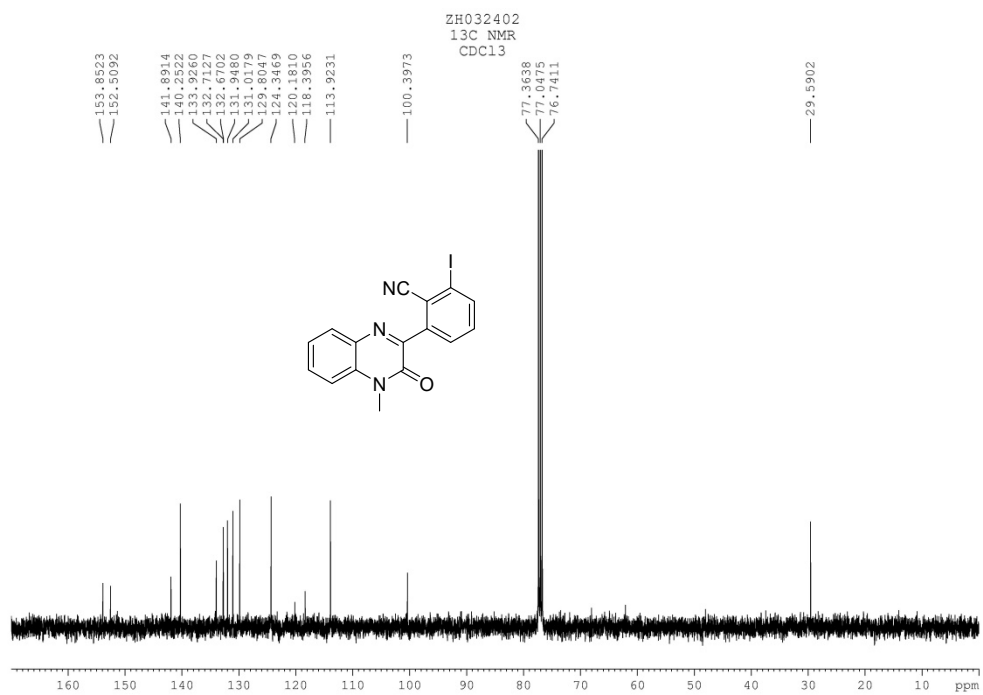

**Fig. 58** <sup>13</sup>C NMR spectrum of compound **3ag**



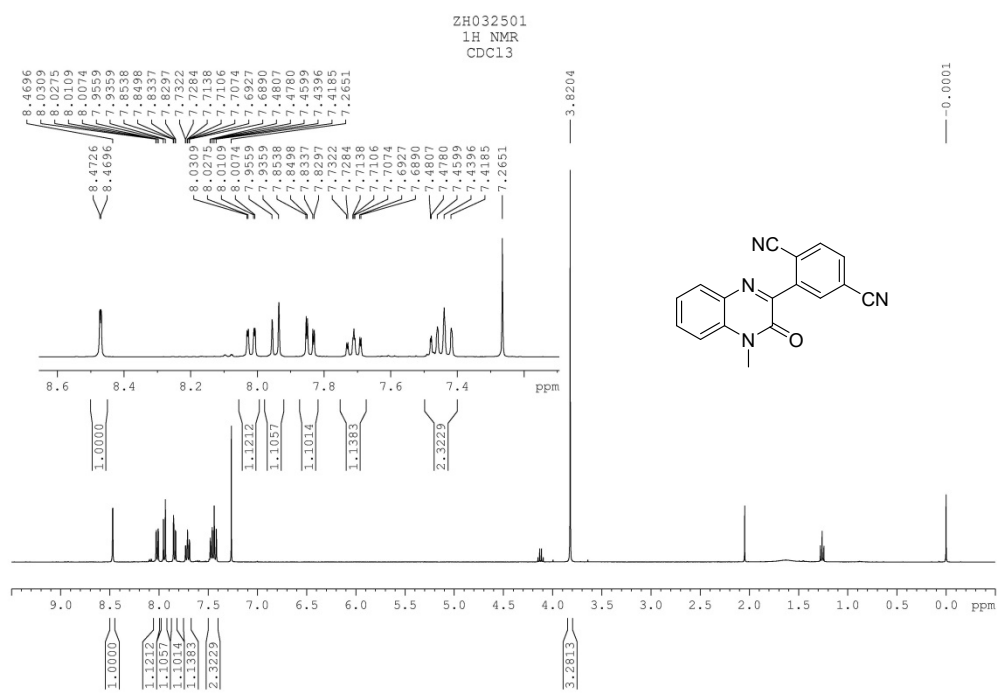

Fig. 59 <sup>1</sup>H NMR spectrum of compound 3ah

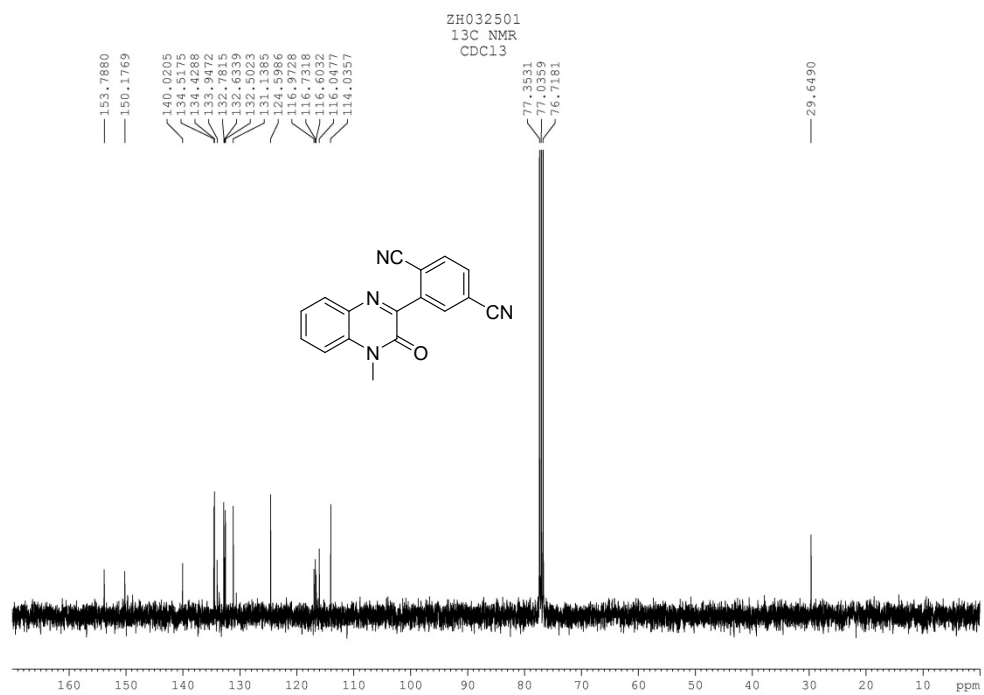

Fig. 60 <sup>13</sup>C NMR spectrum of compound 3ah

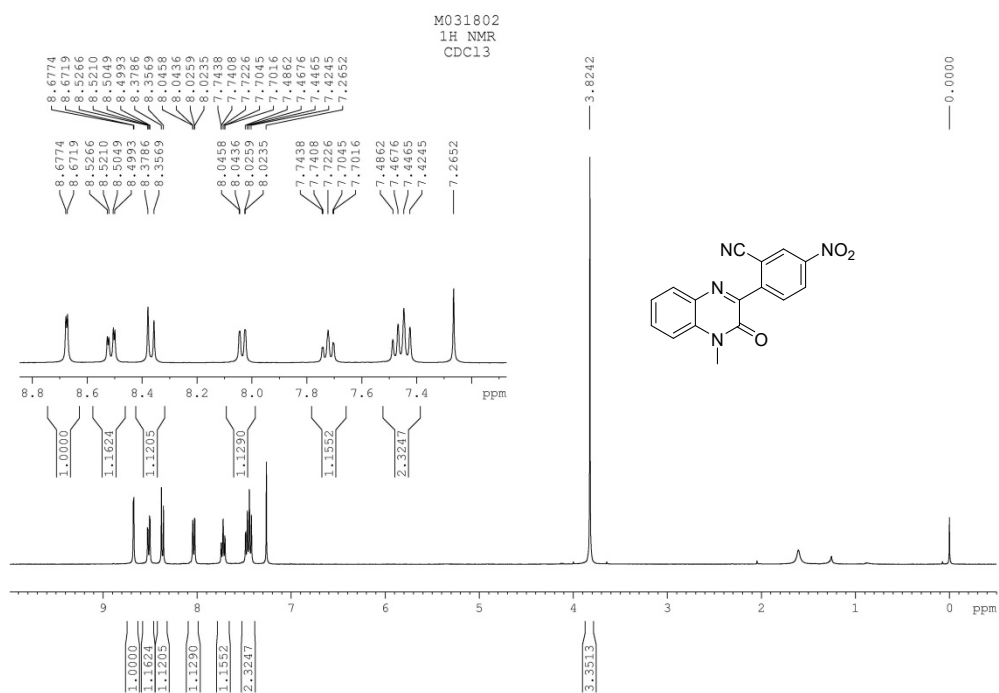

Fig. 61  $^1\text{H}$  NMR spectrum of compound 3ai

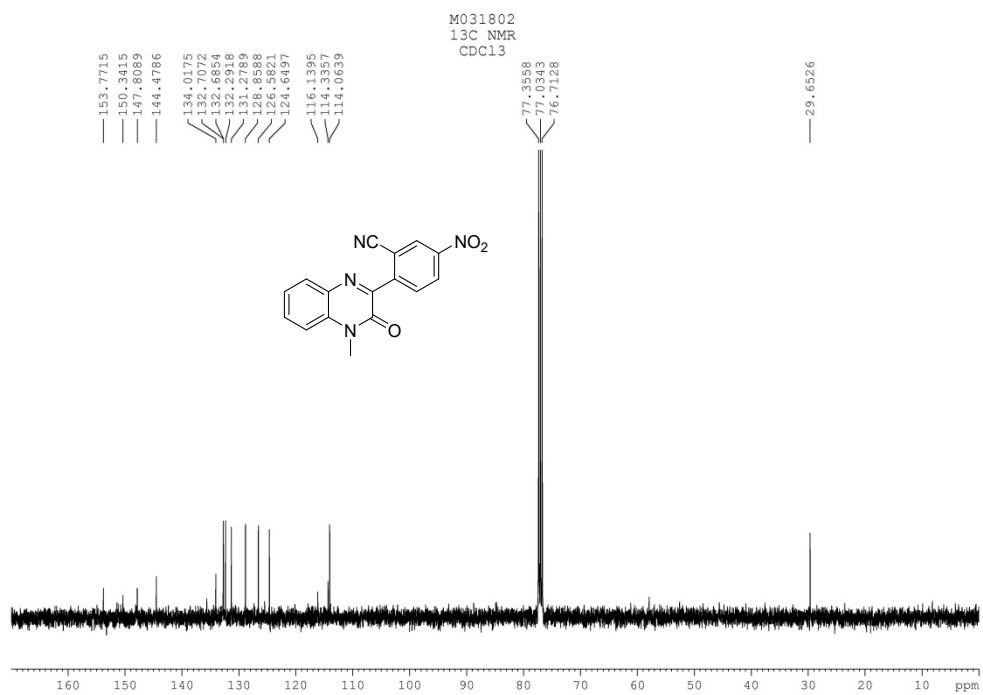

Fig. 62  $^{13}\text{C}$  NMR spectrum of compound 3ai

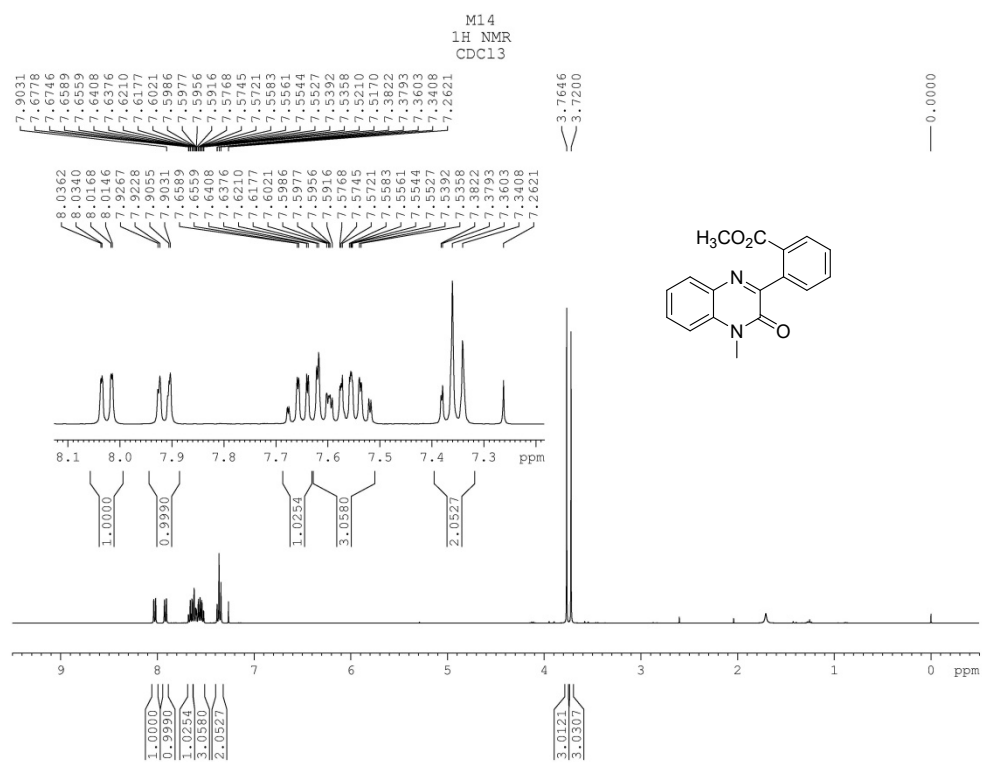

Fig. 63 <sup>1</sup>H NMR spectrum of compound 4

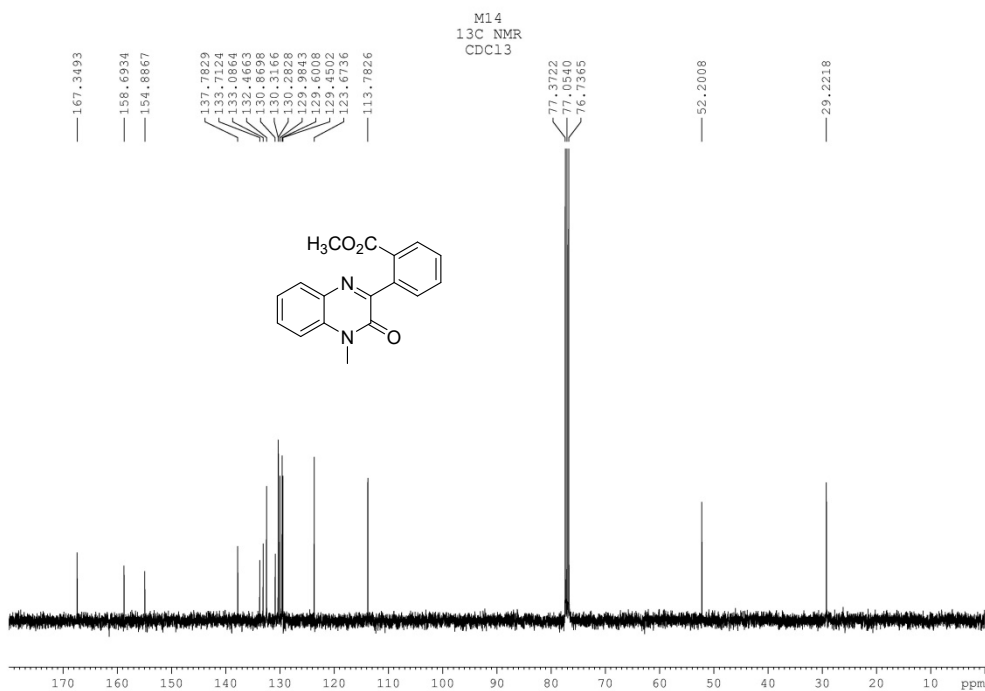

Fig. 64 <sup>13</sup>C NMR spectrum of compound 4

55#66 RT: 0.22 AV: 1 SB: 1 0.39 SM: 7B NL: 6.84E8  
T: FTMS + p ESI/Full ms [0.0000-600.0000]

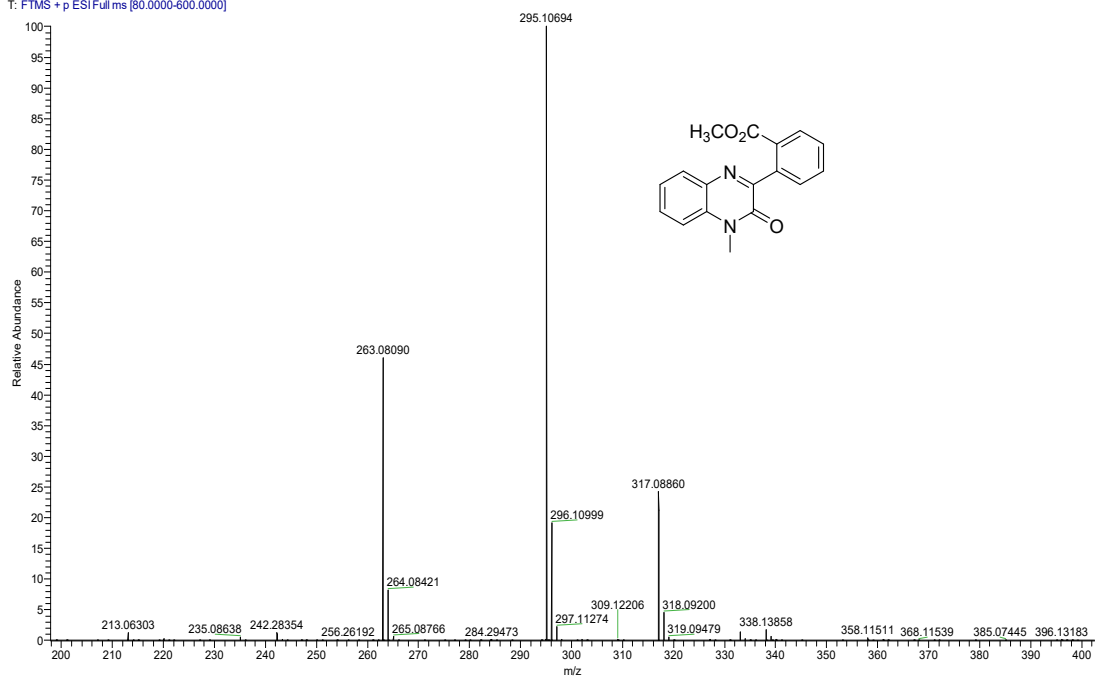

Fig. 65 HR MS spectrum of compound 4

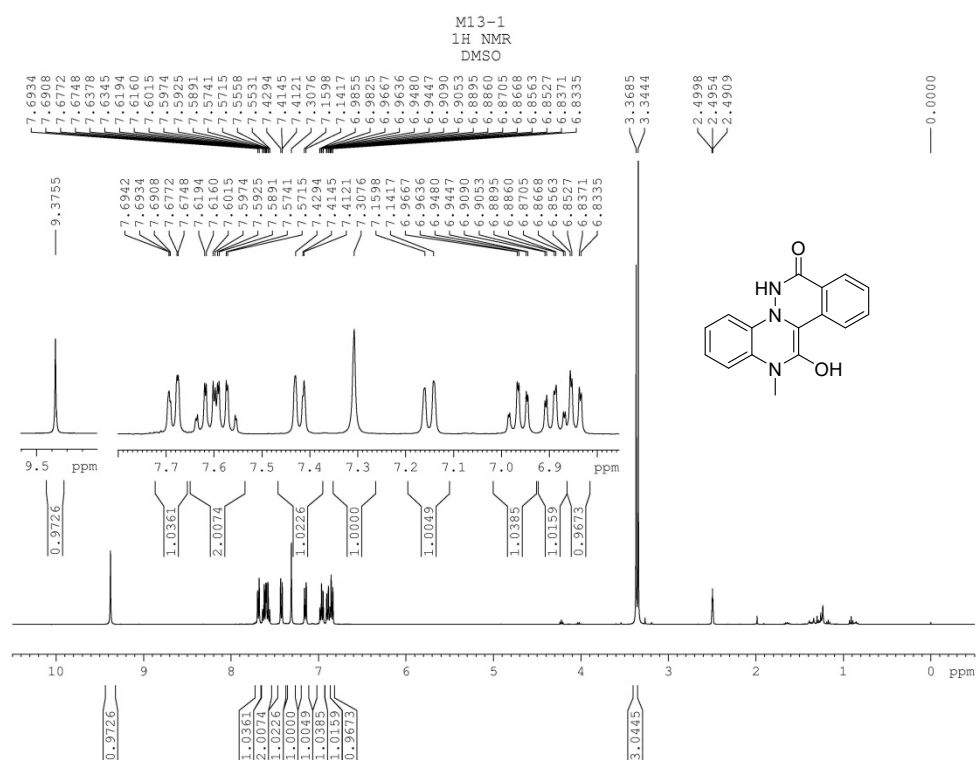

Fig. 66 <sup>1</sup>H NMR spectrum of compound 5

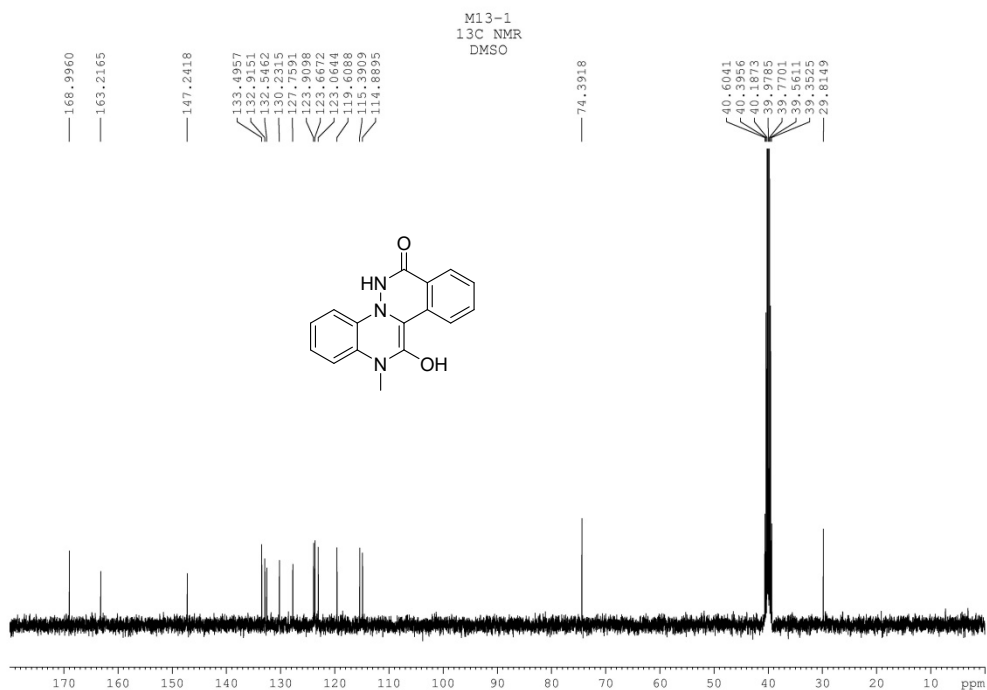

Fig. 67 <sup>13</sup>C NMR spectrum of compound 5

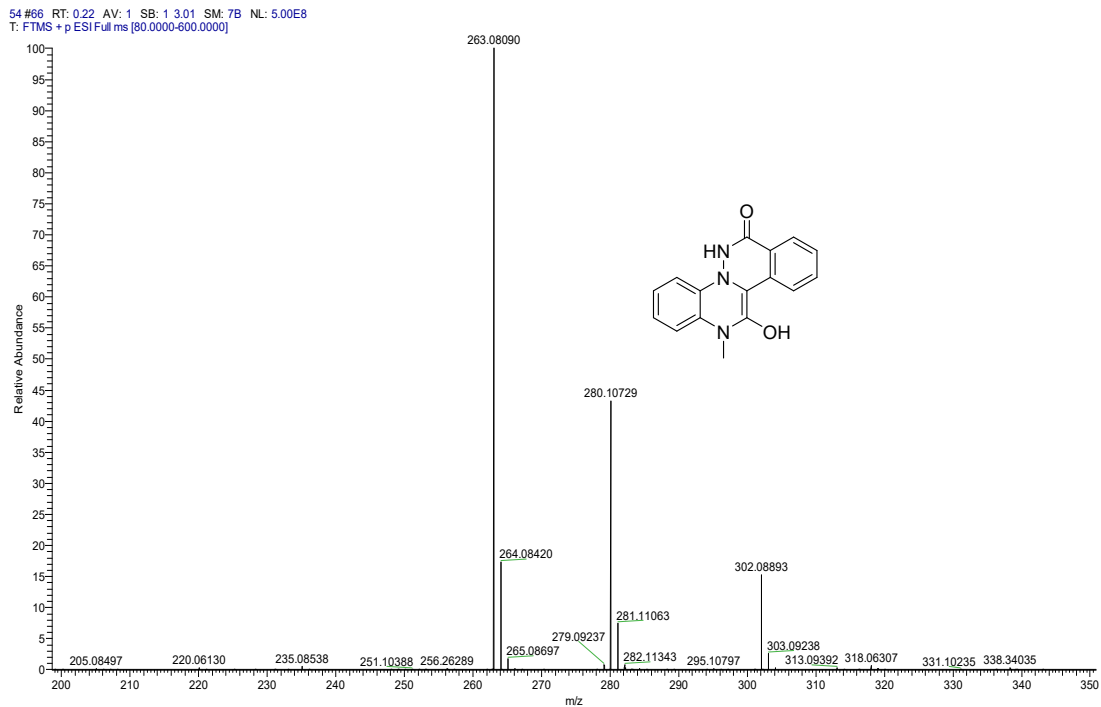

Fig. 68 HR MS spectrum of compound 5

#### 4 D<sub>2</sub>O deuterium substitution experiment of product 5

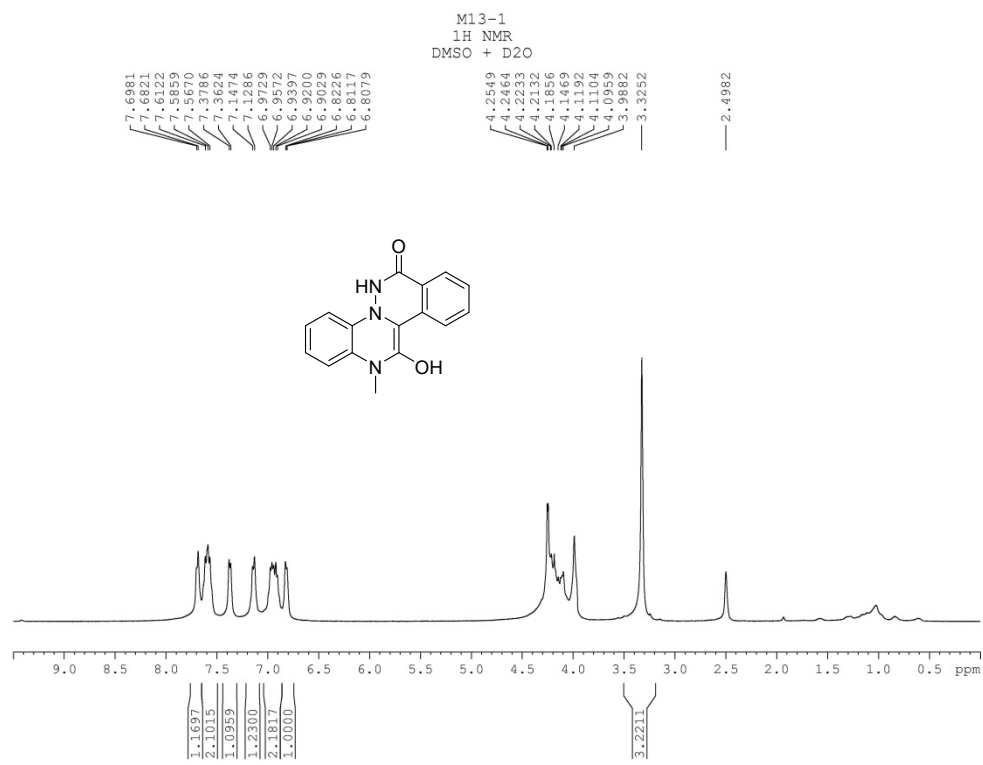

Fig. 69 <sup>1</sup>H NMR spectrum of compound 5 (D<sub>2</sub>O + DMSO as co-solvent)

#### 5 HR MS spectrum of the adduct 6

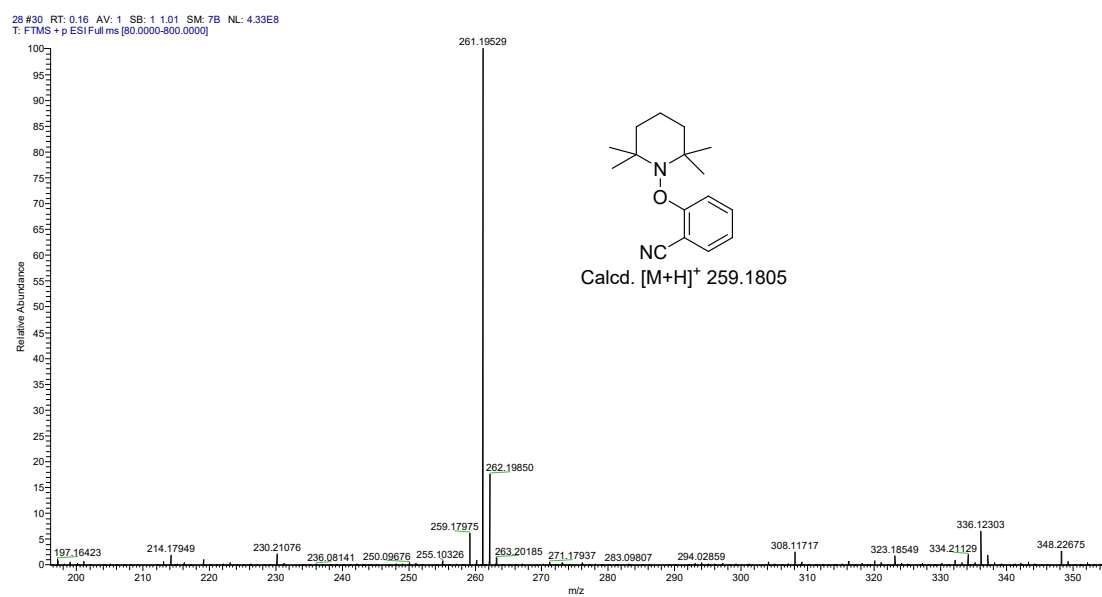

Fig. 70 HR MS spectrum of the adduct 6

## 6 HR MS spectrum of the adduct 7

30 #27 RT: 0.14 AV: 1 SB: 1.1.01 SM: 7B NL: 1.72E7  
T: FTMS +p ESI Fullms [80.0000-800.0000]

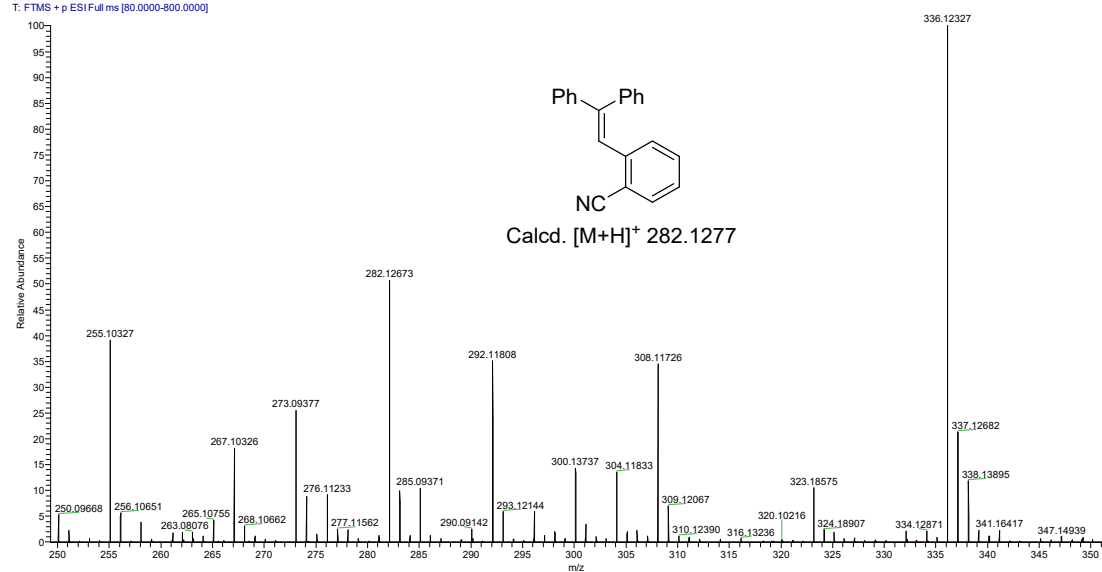

Fig. 71 HR MS spectrum of the adduct 7
